1 **Full title:**

2 **Anticipatory energization revealed by pupil and brain**  
3 **activity guides human effort-based decision making**

4  
5 **Abbreviated title:**

6 Arousal guides effort-based choices

7 **Author names**

8 Irma T. Kurniawan<sup>1\*</sup>, Marcus Grueschow<sup>1</sup>, & Christian C. Ruff<sup>1</sup>

9 **Affiliations**

10 <sup>1</sup> Zurich Center for Neuroeconomics

11 Department of Economics, University of Zurich

12 Blümlisalpstrasse 10, 8006 Zürich

13 \*Corresponding author ([irma.kurniawan@gmail.com](mailto:irma.kurniawan@gmail.com))

14  
15  
16 **Abstract**

17 An organism's fitness is determined by how it chooses to adapt effort in response to challenges.  
18 Actual effort exertion correlates with activity in dorsomedial prefrontal cortex (dmPFC) and  
19 noradrenergic pupil dilation, but little is known about how these neurophysiological processes  
20 guide decisions about future efforts: They may either provide anticipatory energization helping to  
21 accept the challenge, or a cost representation weighted against expected rewards. Here we  
22 provide evidence for the former, by measuring pupil and fMRI brain responses while humans  
23 chose whether to exert efforts to obtain rewards. Pupil-dilation rate and dMPFC fMRI activity  
24 related to anticipated effort level, with stronger correlations when participants chose to accept the  
25 challenge. These choice-dependent effort representations were stronger in participants whose  
26 behavioral choices were more sensitive to effort. Our results identify a process involving the  
27 peripheral and central human nervous system that guides decisions to exert effort by simulating  
28 the required energization.  
29

## 30 **Introduction**

31  
32 Should I go to the gym tonight or should I skip training? Such trade-offs between effort and reward  
33 are commonplace in our everyday lives. In fact, the ability to choose between high cost, high yield  
34 or low cost, low yield actions is crucial for survival in all animals (Bautista, Tinbergen, and Kacelnik  
35 2001). Reward signals found in the dopaminergic (DA) and core brain reward circuitry have long  
36 been identified to play a pivotal role in appetitive motivation and in guiding choices (Schultz,  
37 Dayan, and Montague 1997; Bartra, McGuire, and Kable 2013; Niv, Daw, and Dayan 2005;  
38 Beierholm et al. 2013; Varazzani et al. 2015; Schultz 2002; Walton and Bouret 2019; Ostlund et  
39 al. 2011). By contrast, it is much less clear how decisions may be guided by effort signals.  
40 Previous work has indicated that neural signals for effort in the noradrenergic (NA)  
41 neuromodulatory arousal system (Varazzani et al. 2015; Zénon, Sidibé, and Olivier 2014) and  
42 fronto-insular network (Aridan et al. 2019; Arulpragasam et al. 2018; Kurniawan et al. 2013;  
43 Skvortsova, Palminteri, and Pessiglione 2014; Hauser, Eldar, and Dolan 2017; Meyniel et al. 2013;  
44 Prevost et al. 2010) scale monotonically with increasing task-difficulty levels (McGuire and  
45 Botvinick 2010), but how these neuromodulatory processes and neural representations  
46 functionally contribute to the choice process and goal-directed behaviour is unknown.

47 Two possible functional roles of effort signals have been proposed. First, a prevailing view  
48 in decision theory posits that efforts incur action **costs** that are weighed against the rewards to  
49 compute the net value of the action (Hull 1943). Consistent with this view, several human  
50 functional magnetic resonance imaging (fMRI) studies show net value signals for reward that are  
51 subjectively “discounted” by effort (Aridan et al. 2019; Arulpragasam et al. 2018; Bernacer et al.  
52 2019; Chong et al. 2017; Prevost et al. 2010; Burke et al. 2013; Klein-Flügge et al. 2016). However,  
53 these net value signals primarily reflect the rewarding aspects of the choice options, which impairs  
54 direct interpretations whether these signals truly reflect effort and how effort per se may impacts  
55 on the choice process.

56           Second, consistent with the idea that effort represents resource mobilization (Hockey, G.  
57 Robert 1997), decisions may require an estimation of the **energization** needed to ensure that the  
58 action under consideration can be successfully achieved (Paravlic et al. 2018). A sizeable  
59 literature indicates that locus coeruleus noradrenergic (LC-NA) activity plays an important role in  
60 changing arousal states (Pfaff, Martin, and Faber 2012; Takahashi et al. 2010; Poe et al. 2020)  
61 by providing neuromodulatory input to the entire neocortex (Porrino and Goldman-Rakic 1982;  
62 Chandler, Lamperski, and Waterhouse 2013; Schwarz et al. 2015), thereby facilitating  
63 energization (Varazzani et al. 2015; Jahn et al. 2018). NA activity can directly influence pupil size  
64 and is tightly linked to changes in pupil dilation (Joshi et al. 2016; Reimer et al. 2016; Gelbard-  
65 Sagiv et al. 2018), making phasic, task-related pupil an accurate indicator of brain arousal states  
66 (Yüzgeç et al. 2018; McGinley et al. 2015). However, it remains unclear whether the effort signals  
67 that guide choices would also draw on the same pupil-linked NA arousal system that has been  
68 found to facilitate actual behavior energization (Varazzani et al. 2015; Zénon, Sidibé, and Olivier  
69 2014; Borderies et al. 2020; Xiang et al. 2019).

70           Teasing apart these two scenarios is not trivial. One effective way forward is to investigate  
71 how signals that scale with effort levels differ depending on choice outcomes. Namely either “Yes”  
72 decisions, in which we choose to engage effort (e.g., exercising at the gym) versus “No” decisions  
73 whereby we forego the effort (Kurniawan et al. 2010). In a cost scenario, stronger brain signals for  
74 effort (after controlling for rewards) would decrease the option’s net value and push individuals  
75 towards a “No” decision. Thus, a cost scenario would predict a steeper neural effort signal in “No”  
76 compared to “Yes” decisions. In an energization scenario, by contrast, a higher effort signal would  
77 trigger readiness to mobilize resources and tip individuals towards a “Yes” decision. The  
78 energization scenario would therefore predict the opposite pattern of steeper effort-related signals  
79 during “Yes” compared to “No” decisions (Fig. 1A).

80

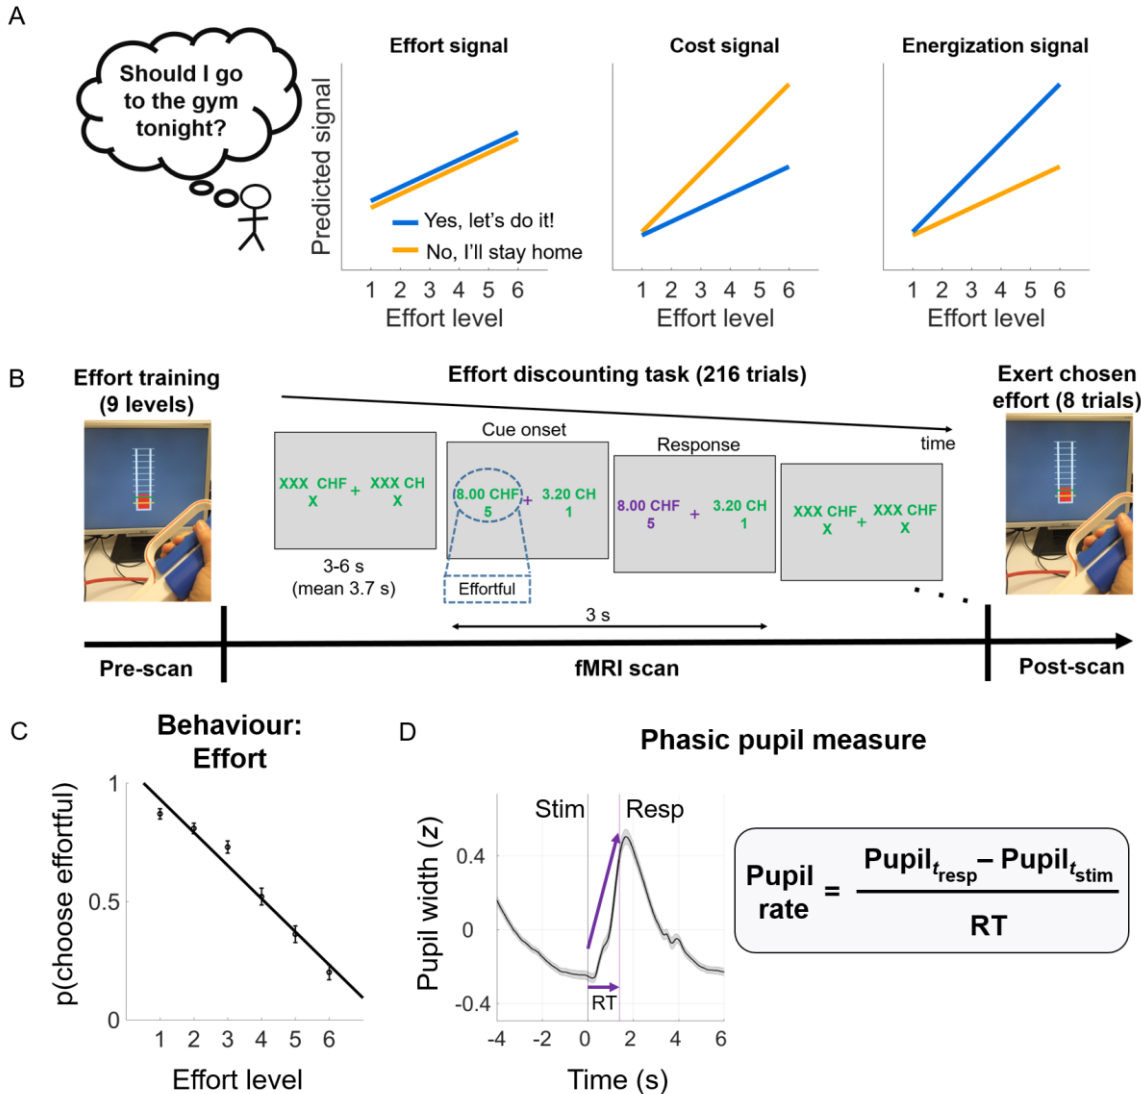

81

82 **Figure 1. Predictions, task design, and key measures. A) Three possible patterns of**

83 **anticipatory neural responses to effort. Left: Signals coding for effort per se would scale**

84 **monotonically with effort regardless of choice. Middle: Signals coding for the decision cost**

85 **associated with effort should be steeper across effort levels when individuals reject the effort.**

86 **Right: Signals coding the anticipatory energization needed to accept the challenge should be**

87 **steeper across effort levels when when individuals accept the effort. B) Experimental paradigm.**

88 **Pre-scan: Participants received visually-guided effort training on a hand-held dynamometer.**

89 **Levels 1-9 correspond to 10-90% maximum voluntary contraction (MVC). In the fMRI scanner,**

90 **participants chose between an effortful option associated with variable amounts of reward and**

91 **effort and a non-effortful option with smaller reward. Post-scan: Outside the scanner, eight**

92 **randomly selected trials were realized and participants executed the effort they chose to obtain**

93 **the reward. C) Behavioural effort sensitivity. This individual measure was derived by calculating**

94 *for each participant the slope of the probability to choose the effortful option across effort levels.*  
95 **D) Phasic pupil measure.** *Grand-mean of pupil width during decision making showed a*  
96 *stereotypical dilation shortly following stimulus onset, peaking right after averaged response onset*  
97 *(purple line), and constricting down to baseline level around stimulus offset. Pupil rate (z/s) was*  
98 *calculated by subtracting pupil width at response from pupil width at stimulus onset, divided by*  
99 *response times (RT).*

100

101 Here we apply this experimental logic, using an effort/reward tradeoff task in an fMRI  
102 setting, while simultaneously tracking pupil dilation, a putative marker for LC-NA firing. This  
103 combination allows us to investigate systematically to what degree the brain arousal system may  
104 encode anticipated effort during decision making as a cost or energization signal.

105 First, we explored whether pupil-linked arousal, as measured in rate of pupil change (Joshi  
106 et al. 2016; Reimer et al. 2016), scales monotonically with increasing effort, and if such effort  
107 sensitivity in the pupil rate differs depending on choice outcome (“Yes” vs “No”).

108 Second, at the neural level, we similarly examined whether known cortical representations  
109 of effort reflect a neural version of such choice-dependent effort signal. Based on previous work  
110 with a similar paradigm (Kurniawan et al. 2013; Skvortsova, Palminteri, and Pessiglione 2014;  
111 Meyniel et al. 2013; Prevost et al. 2010; Hauser, Eldar, and Dolan 2017), we expected these  
112 signals to be localized within the fronto-insular network, which based on its connectivity to the LC  
113 (Poe et al. 2020) may be strongly affected by NA arousal processes.

114 Third, if such effort signaling is at all behaviorally relevant, then we expect individuals who  
115 show stronger choice-dependent effort signals in pupil and the brain to display stronger effort  
116 sensitivity in their behavior, namely in choice frequencies. In the cost scenario, we would expect  
117 behavioral effort sensitivity to be positively correlated with the difference in effort scaling of “No” >  
118 “Yes” decisions, since individuals who assign higher costs to effort should forego the effort  
119 challenge more often. The energization scenario, by contrast, would predict behavioral effort  
120 sensitivity to be positively correlated with the difference in effort scaling of “Yes” > “No” decisions,

121 since those behaviorally more affected by effort would need a stronger energization signal to  
122 accept a given effort level.

123 Fourth, we conducted a series of control analyses to ascertain that the observed effects  
124 were not driven by changes in choice difficulty and reward value of the options. Moreover, since  
125 endogenous fluctuations of arousal states may cause a general bias towards exerting effort  
126 (Murphy, Vandekerckhove, and Nieuwenhuis 2014), and since elevated emotional arousal prior  
127 to a force-production task can increase voluntary effort (Schmidt et al. 2009), we also controlled  
128 for effects of tonic pupil signals as indexed by pre-trial pupil baseline level (PBL).

129

## 130 **Results**

131

132 In the fMRI scanner, participants made a series of effort/reward tradeoff choices between an  
133 effortful option and a non-effortful option (Fig. 1B). On each trial, the effortful option entailed  
134 varying amounts of effort (1 of 6 levels, 40-90% maximum voluntary contraction—MVC; shown as  
135 levels 4-9) and reward (1 of 6 levels, 0.5-10 CHF; Fig. 2A). The non-effortful option entailed  
136 minimal effort (fixed at level 1) and a lower reward amount (30 or 40% of the reward amount of  
137 the effortful option). Each effort to be considered entailed 10 repetitions ('reps') of hand muscle  
138 contractions (3 s) and relaxations (3 s) and was implemented outside the scanner 30-60 minutes  
139 after the experiment. Indeed, during the scan participants were not provided with a hand  
140 dynamometer device and thus were fully aware that they would make successive decisions  
141 without executing the force task. We implemented this temporal separation between decisions  
142 and actual exertion to set up a hard test whether arousal effects could still be observed in cases  
143 where post-decisional motor preparation was completely absent. Given this experimental design,  
144 any phasic arousal effect could not be due to an impending motor action, and any lack of such an  
145 effect would unlikely be due to the effort task being hypothetical or trivial. We could thus investigate

146 whether pupil-linked arousal scales with increasing physical effort during mere mental simulation  
147 when deciding about future efforts.

148

### 149 ***Systematic effort-reward trade-offs during choice***

150

151 Initial analyses confirmed that participants indeed systematically traded off the proposed efforts  
152 and rewards when making decisions (Fig. 2A), as expected based on previous work (Prevost et  
153 al. 2010; Kurniawan et al. 2010; Chong et al. 2017). Effortful options were selected significantly  
154 more often when they offered higher rewards and lower effort amounts (Fig. 2C; logistic regression  
155 of choice; 1=choose effortful, 0=choose non-effortful;  $N=49$ ; adjusted  $R^2 M=0.62$ ,  $SEM=0.017$ ;  
156  $t_{\text{reward}}(48)=6.93$ ,  $p<0.0001$ ;  $t_{\text{effort}}(48)=-7.25$ ,  $p<0.0001$ ). In particular, effortful options were selected  
157 / abandoned most often when they were clearly attractive (high rewards for low effort) / unattractive  
158 (low rewards for high efforts), although the interaction effect was only marginally significant  
159 ( $t_{\text{reward*effort}}(48)=-1.93$ ,  $p=0.06$ ). This 'standard' logistic regression model confirms previous findings  
160 that decisions vary as a function of the offered rewards and the required effort. Furthermore, we  
161 found evidence in response times (RT) data (Fig. 2B) that choice outcome may further reveal  
162 information about the decision process. Multiple regression of RT (z-scored) confirmed significant  
163 effects of reward and effort ( $N=49$ ; adjusted  $R^2 M=0.22$ ,  $SEM=0.014$ ;  $t_{\text{reward}}(48)=3.93$ ,  $p=0.0003$ ;  
164  $t_{\text{effort}}(48)=-5.90$ ,  $p<0.0001$ ). In addition, RTs were faster when participants selected the effortful  
165 option than when they selected the non-effortful option ( $t_{\text{choice}}(48)=-4.46$ ,  $p<0.0001$ ; other effects:  
166  $t_{\text{choice*reward}}(48)=-5.82$ ,  $p<0.0001$ ;  $t_{\text{choice*effort}}(48)=8.44$ ,  $p<0.0001$ ;  $t_{\text{constant}}(48)=6.68$ ,  $p<0.0001$ ;  
167  $t_{\text{reward*effort}}(48)=-0.8$ ,  $p=0.41$ ;  $t_{\text{choice*reward*effort}}(48)=1.3$ ,  $p=0.019$ ).

168

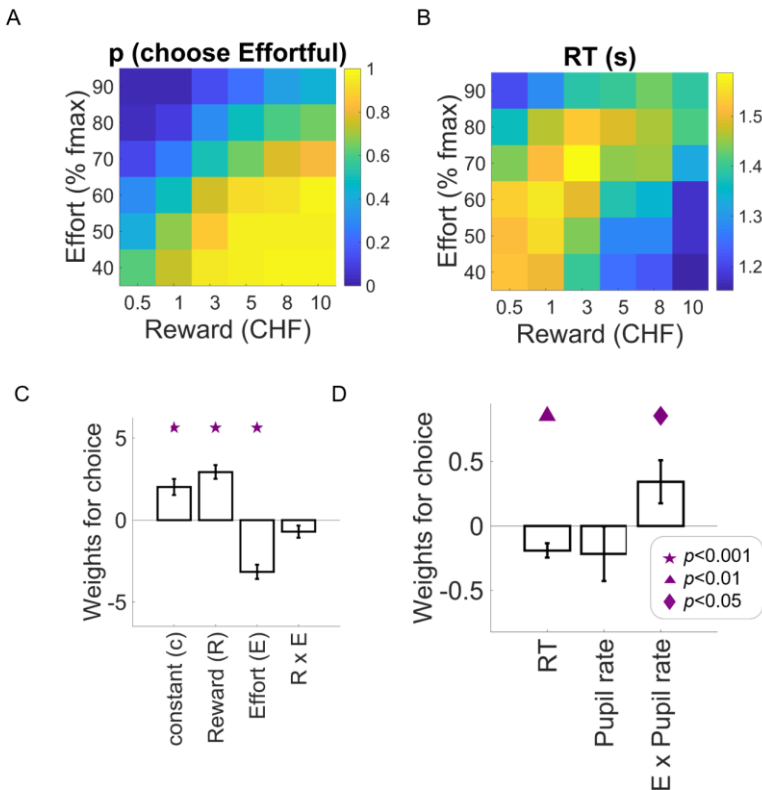

169

170 **Figure 2. Behavioral and pupil results.** Choice proportions (A) and RT (B) as a function of  
 171 reward and effort associated with the effortful option. **C)** Weights of logistic regression of choice  
 172 (1=effortful; 0 non-effortful) on reward, effort, and the interaction from a ‘standard’ model based  
 173 on the offers the participants see on the screen. **D)** Weights of logistic regression of choice on RT,  
 174 pupil rate, and effort-by-pupil rate interaction from an extended model (containing the standard  
 175 model, RT, pupil rate, and other variables; see Supplementary Materials). This extended  
 176 regression (D) had a higher model-fit (adjusted R-squared) than the standard one (C),  $t(48)=5.35$ ,  
 177  $p<0.0001$ , suggesting that pupil measures together with other task parameters such as reward,  
 178 effort, and RT, can explain choice above and beyond the ‘standard’ option attributes (reward and  
 179 effort). Symbols indicate significance levels against zero. Bar plots display means  $\pm$  1 standard  
 180 error of the mean (SEM).

181

### 182 **An energization signal in the rate of pupil change**

183

184 We then investigated whether pupil change rate contained information correlated with choice  
 185 outcome, over and above the known effects of reward and effort. To this end, we added pupil



186 measures to the ‘standard’ logistic regression of choice (Fig 2C). This extended regression (Fig.  
187 2D) replicated the effects of reward and effort, ( $N=49$ ; adjusted  $R^2 M=0.65$ ,  $SEM=0.018$ ;  
188  $t_{\text{reward}}(48)=6.56$ ,  $p<0.0001$ ;  $t_{\text{effort}}(48)=-7.39$ ,  $p<0.0001$ ), and also revealed a significant reward-by-  
189 effort interaction,  $t_{\text{reward*effort}}(48)=-2.41$ ,  $p=0.019$ . Crucially, the extended regression revealed a  
190 significant interaction between effort level and pupil rate,  $t_{\text{effort*pupil\_rate}}(48)=2.04$ ,  $p=0.04$  (see  
191 supplementary materials for full statistics of the extended regression).

192 To examine whether this interaction effect reflects stronger effort representations for “yes”  
193 choices (i.e., energization) or for “no” choices (i.e., a cost signal, see Fig 1A), we directly examined  
194 the slopes of the regressions of pupil signals on anticipated effort levels during both types of choice  
195 outcomes. Averaged across both types of outcomes, the regression slope was indeed positive  
196 (one-sample t-test on averaged effort slopes across choice:  $t(48)=3.24$ ,  $p=0.002$ ) but importantly,  
197 it was significantly steeper when participants chose the effortful option compared to when they  
198 chose the non-effortful option, effort-by-choice interaction,  $t(48)=2.59$ ,  $p=0.012$  (Fig 3C). Thus, the  
199 pattern of effort representations in pupil signal during “yes” and “no” choices is consistent with the  
200 scenario that arousal system engagement during choice relates to energization for the future  
201 challenge that is being pondered.

202

### 203 ***Neural responses in dmPFC also reflect energization***

204

205 To identify neural processes that may similarly reflect energization, we then examined BOLD  
206 responses during the decision process. Analysis of the brain responses time-locked to the  
207 presentation of the options (stimulus onset) revealed a significant, and structurally similar, effort-  
208 by-choice interaction in dmPFC (covering both SMA and ACC; peak MNI space coordinates: [-3,  
209 18, 45];  $t$  value, 5.32; extent: 301 voxels;  $p<0.0001$  FWE; Fig. 3B; GLM1). No other brain areas  
210 showed signals that survived whole-brain FWE correction (Table 1). ROI analysis within the  
211 dmPFC functional cluster illustrates that the activity related to anticipated effort strength is indeed

212 higher in trials where the effortful option was selected compared to foregone (Fig. 3D solely for  
213 illustration; GLM2). Thus, similar to the pupil signals described above, BOLD activity in dmPFC  
214 also shows anticipatory effort signaling in a way that is consistent with energization to overcome  
215 future physical challenges.

216

### 217 ***Energization signals in pupil and dmPFC relate to behavioral effort sensitivity***

218

219 To investigate whether the energization signals in pupil and dmPFC activity are indeed  
220 behaviorally relevant, we tested whether the difference in effort coding (slope across effort levels)  
221 between “yes” and “no” responses was associated with individual differences in how the  
222 anticipated degree of effort affected choice outcomes. For this analysis, we performed for each  
223 individual a simple logistic regression of choice on the associated effort levels (transformed such  
224 that a positive slope means higher likelihood to forego the option with increasing effort). The  
225 individual slopes of these regressions - our behavioral measure of effort sensitivity – were indeed  
226 positively correlated with the strength of each individual’s effort-by-choice effect in both pupil rate  
227 and dmPFC activity (taken from the ROI analysis), *robust regressions*  $b_{\text{pupil\_rate}(47)}=0.70$ ,  $p=0.043$ ;  
228  $b_{\text{dmPFC}(47)}=3.56$ ,  $p=0.038$ ; Fig. 3E-F). Thus, subjects with higher effort sensitivity (whose overall  
229 choice was more strongly affected by increasing effort) indeed showed, in both pupil rate and  
230 dmPFC activity, steeper effort coding when the effortful option was selected compared to when it  
231 was foregone. Therefore, the energization responses in pupil rate and the brain indeed appear to  
232 be relevant for guiding choices.

233

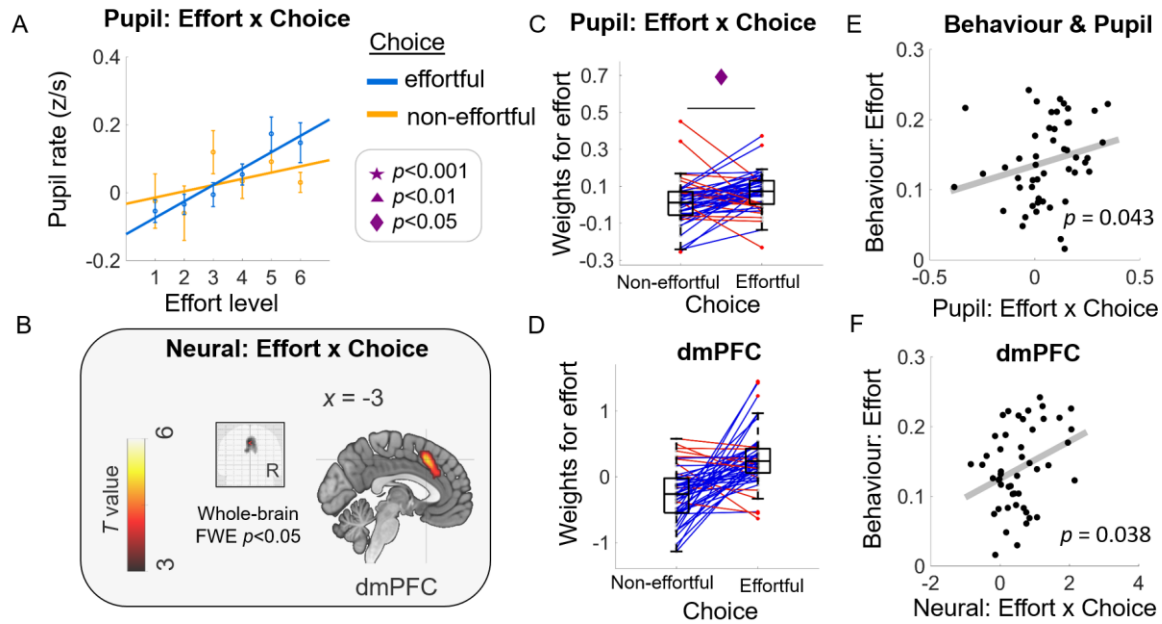

234  
235  
236 **Figure 3. Energization signals in pupil and brain activity correlated with behavioural effort**  
237 **sensitivity.** Consistent with the energization scenario, effort representations in pupil (A) and in  
238 the brain (B) are higher when participants accepted compared to rejected the effortful option  
239 (Choice “effortful” versus “non-effortful”). This significant effort-by-choice interaction effect is  
240 evidenced by higher effort beta weights when participants chose the effortful versus the non-  
241 effortful option in pupil (C) and in extracted BOLD signal change within dmPFC functional ROI (D;  
242 displayed solely for illustration purposes; no statistical test was done). Both the pupil (E) and  
243 neural (F) energization signals were positively correlated with individual behavioural measure of  
244 effort sensitivity as shown in Fig 1C. Panel A: Dots with error bars represent means  $\pm$  1 SEM.  
245 Lines are linear fits of the means (using the MATLAB `polyfit(x,y,1)` function). Panel B: Glass-brain  
246 image and sagittal slice showing that BOLD amplitude in dmPFC is uniquely correlated with effort-  
247 by-choice regressor. Panels C & D: Boxplots display the median (central line), 25<sup>th</sup> and 75<sup>th</sup>  
248 percentiles (bottom and top edges), and non-outlier low and high extreme values (bottom and top  
249 error bars). Blue lines show subjects whose effort slope is higher in effortful choice than in non-  
250 effortful choice, red lines show subjects who have the opposite effect. Panels E & F: Each data  
251 point represents a subject. P-values represent significance level from robust regressions.

252  
253 **Energization effects in pupil rate are independent of reward value, decision difficulty, or**  
254 **tonic arousal**

255  
256 It is theoretically possible that the effects we observed in pupil rate were driven by differences in  
257 reward or difficulty level of trials where effort is accepted versus rejected. Indeed, increases in  
258 pupil size have been observed for rewarding stimuli (Schneider et al. 2018) and trials that require  
259 greater cognitive control (van der Wel and van Steenbergen 2018). These effects might be  
260 confounded with the energization effect we reported, particularly because in some cases, high  
261 effort trials may be associated with high rewards, hence making the decision to either select or  
262 forego the effortful option more difficult. Our behavioral results had already contradicted these  
263 alternative explanations, since they were derived with statistical models that had accounted for  
264 any variance associated with reward levels and RT (an indirect proxy for decision difficulty (Kiani,  
265 Corthell, and Shadlen 2014)) (see Supplementary Materials). Nevertheless, to show more directly  
266 that the energization effect is clearly independent of reward and difficulty, we repeated the pupil  
267 analyses depicted in Figure 3 but now on the residuals of pupil rate after partialing out the effects  
268 of rewards and of RT (orthogonalization of pupil rate relative to these variables, one at a time).  
269 Once again, these control analyses revealed the effects already shown in top row of Figure 3,  
270 namely (1) stronger effort signals in residual pupil rate when participants accepted versus rejected  
271 the effortful option;  $t_{\text{resid\_reward}}(48)=2.59$ ,  $p=0.012$ ;  $t_{\text{resid\_RT}}(48)=2.53$ ,  $p=0.014$  and (2) significantly  
272 positive associations between the pupil energization effect (effortful>non-effortful) and the  
273 behavioral effort-sensitivity parameter (*robust regression*  $b_{\text{resid\_reward}}(47)=0.71$ ,  $p=0.043$ ;  
274  $b_{\text{resid\_RT}}(47)=0.68$ ,  $p=0.048$ ; (Fig. S4). Furthermore, to rule out an alternative explanation that the  
275 pupil is merely coding for any option attribute that participants experienced as result of their choice  
276 (in our case the other option attribute was reward), we replaced these analyses with a reward-by-  
277 choice interaction (instead of effort-by-choice). These control analyses yielded no significant  
278 reward-by-choice effects in the pupil data or the correlation with behavioral measure of reward  
279 sensitivity (Supplementary Materials, Fig S5). Thus, the energization effect we identified in pupil  
280 rate is independent of reward value, decision difficulty, or a reward-by-choice interaction, and thus

281 reflects different neural mechanisms to those underlying conflict-driven pupil dilations and  
282 behavioral adjustments (Ebitz and Platt 2015).

283 To ascertain that our novel effect is also independent of ongoing background arousal, we  
284 defined the average pupil diameter during 500 ms prior to the presentation of the options as an  
285 index of pre-trial pupil baseline level (PBL). We did not find a relationship between PBL and choice  
286 frequencies (Supplementary material; Fig S2-3). This absence of a link between PBL and effort-  
287 based choice did not reflect more complex interactions with other experimental factors or  
288 influences from the previous trial, as ascertained by logistic regressions of choice on PBL, RT,  
289 reward, effort, and the interactions. Direct test of effort-by-choice interaction effect on PBL also  
290 yielded non-significant results (Supplementary Materials; Fig S2-3). Taken together, we thus  
291 found no evidence that ongoing background arousal state biases subjects to accept high-effort  
292 options, thus confirming the specificity of the energization effect for phasic arousal responses  
293 during the choice process.

294

295 ***Energization effects in dmPFC are independent of neural representations of other task***  
296 ***parameters***

297

298 Importantly, we made sure that the observed energization effects in the dmPFC are indeed novel  
299 and separate from known neural correlates of effort-based decisions. To this end we had included  
300 the effort-by-choice interaction as a regressor together with main effects of choice, reward, effort,  
301 pupil rate, and RT in the same model without any orthogonalization (see methods). This allowed  
302 us to identify neural representations that are unique to each of the task parameters, ensuring that  
303 the effort-by-choice interaction cannot be explained by any combination of the other factors and  
304 allowing us to inspect our data for several known neural representations active during effort-based  
305 decisions (Fig 4).

306 Consistent with previous demonstrations of the role of the dorsolateral prefrontal regions  
307 in executive function (Grueschow, Kleim, and Ruff 2020), we observed higher activity for choosing  
308 the effortful options compared to the non-effortful options in the left medial frontal gyrus. We also  
309 replicated previous findings of positive modulation of reward within the brain valuation system  
310 (Bartra, McGuire, and Kable 2013; Burke et al. 2013), with peak activity at the ventral striatum,  
311 and negative modulation of effort in the insula (Prevost et al. 2010). Moreover, we found slower  
312 button responses to be associated with higher activity in inferior frontal gyrus and faster responses  
313 to be associated with higher activity in a fronto-parietal network that is often implicated in task  
314 engagement (Dosenbach et al. 2008; Cole et al. 2013). Finally, we found faster pupil rate to be  
315 associated with lower amplitudes of BOLD responses to the presentation of the stimuli in the  
316 middle temporal gyrus. By contrast, faster pupil rate is associated with higher BOLD amplitudes  
317 in a large-scale network within the occipital cortex (extending to precuneus), consistent with  
318 established involvement of this network in visual processing (Goodale and Milner 2018). Thus, our  
319 brain results show that the energization signal in dmPFC is a conceptually new choice signal that  
320 is clearly distinct from previously observed effects of reward, effort, choice outcome, RT, and pupil  
321 signals (all reported effects survive whole-brain FWE correction, full statistics in Table 1).  
322

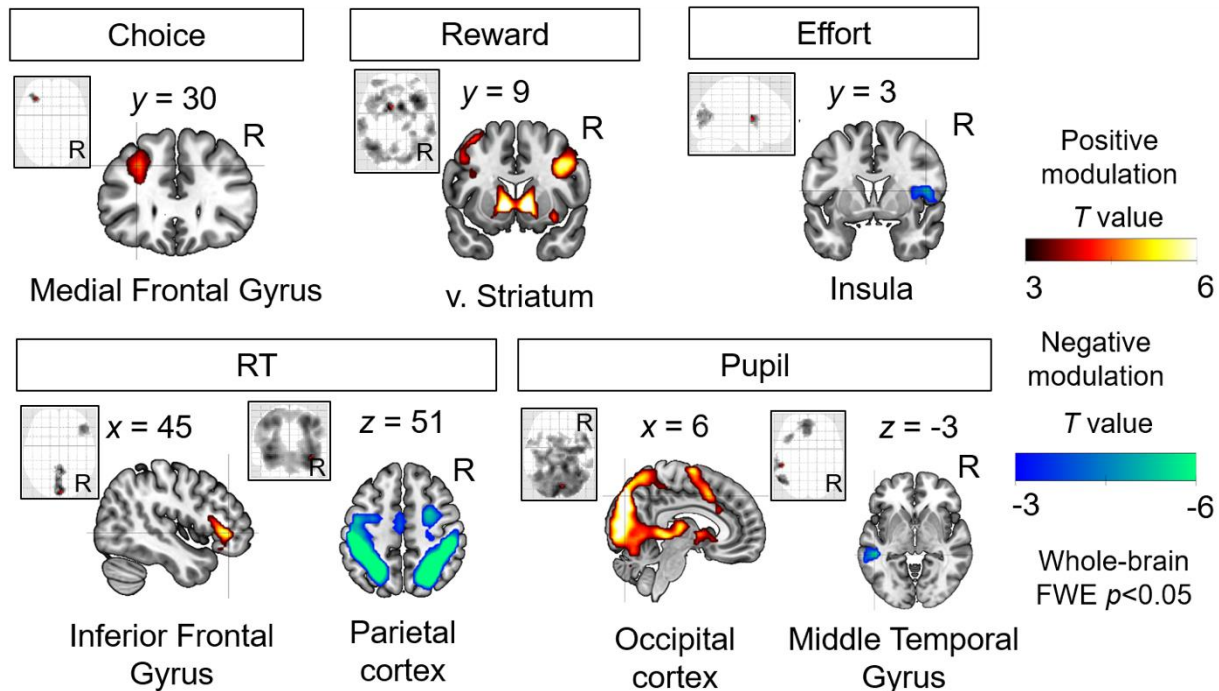

323  
324 **Figure 4. Neural representations of choice, reward, effort, RT, and pupil rate.** These plots  
325 show whole-brain statistical parametric maps for neural representations of choice (effortful > non-  
326 effortful), reward, effort, RT, and pupil,  $p < 0.05$  FWE corrected. These established effects were  
327 derived with the same statistical model also used to identify the energization signals displayed in  
328 Figure 3; the latter signal is therefore specific and unrelated to these classic effects reported in  
329 the literature.

## 330 331 Discussion

332  
333 We investigated how the brain employs neural effort representations to guide choice. We directly  
334 tested two competing hypotheses on whether such neurobiological signal for effort reflects a cost  
335 or energization signal. Consistent with the latter, our results show that effort representations in  
336 both arousal system activity (as measured via rate of pupil dilation) and dmPFC activity are  
337 enhanced for decisions to exert a sizeable amount of effort. This indicates that during decision  
338 making, effort is represented by the peripheral and central nervous system in a way that may  
339 relate not to a “decision cost” but rather to simulating the energization needed to exert the effort  
340 in the future. Importantly, our results control for general arousal effects that could have been driven



341 by reward value, decision difficulty, or background tonic arousal, thereby emphasizing the  
342 functional specificity of this energization signal.

343 Our results emphasize that phasic pupil-linked arousal during the decision process is tightly  
344 related to the amounts of effort that an individual agrees to invest, but they also raise the question  
345 what neural mechanisms may lie at the heart of this link between pupil and behavior. While the  
346 temporal sluggishness of the BOLD signal makes it difficult to provide a conclusive answer, we  
347 outline at least two plausible possibilities based on recent advances. First, simulating the required  
348 energization could trigger a “bottom-up” arousing influence that pushes decisions towards  
349 accepting effort. This would be consistent with the widely held view (Glimcher 2009) that the  
350 strength of neural representations for decision attributes directly influence choice – for instance, it  
351 has been shown that intensifying encoded rewards through simulation of future episodic events is  
352 linked with decisions that promote higher long-term pay-offs (Benoit, Gilbert, and Burgess 2011;  
353 Peters and Büchel 2010; Dassen et al. 2016; Bulley and Gullo 2017) and even with increases in  
354 prosocial behavior (Gaesser, Keeler, and Young 2018). Given this assumption, the arousal signal  
355 we observed in this study might either down-modulate anticipated effort costs or shift the decision  
356 rule (de Gee, Knapen, and Donner 2014), implying that a sufficiently strong arousal signal could  
357 bias a decision towards taking on the physical challenge. As for neural implementation, phasic LC  
358 activity is known to transmit feedforward information to ACC via ascending projections to prefrontal  
359 areas (Porrino and Goldman-Rakic 1982; Schwarz et al. 2015; Chandler, Lamperski, and  
360 Waterhouse 2013), providing a plausible pathway for such bottom-up influences. Nervous readout  
361 of the autonomous arousal activation could provide a signal that the organism is indeed ready to  
362 take on the physical challenge, instantiating an additional mechanism to bias choices.

363 Second, simulated energization could simply be a byproduct of choice, implying a top-  
364 down influence from the cortical decision circuit to the arousal system. Decision outcomes could  
365 be relayed in the form of cortical descending input from the PFC into LC. ACC/dmPFC activity has  
366 been coupled with pupil diameter (de Gee et al. 2017; Ebitz and Platt 2015), and the timing of



367 pupil modulation by ACC in some cases precedes that by LC (Joshi et al. 2016). Existing tracing  
368 data in rodents and monkeys also show afferent PFC projections as the main direct cortical  
369 influence on LC (Arnsten and Goldman-Rakic 1984; Dalsass et al. 1981). Intracranial stimulation  
370 in human ACC leads to subjective accounts of changes in arousal states, such as increased heart  
371 rate, coupled with the anticipation of challenges and a strong motivation to overcome difficult  
372 obstacles (Parvizi et al. 2013). This interpretation is also closely linked, though not identical, with  
373 the proposal that ACC computes the expected value of mobilizing mental resources (Shenhav,  
374 Cohen, and Botvinick 2016). Taken together, these observations are consistent with the idea of a  
375 top-down influence from dmPFC to the NA arousal system (Aston-Jones and Cohen 2005;  
376 Grueschow, Kleim, and Ruff 2020) that may serve to transmit information about the commitment  
377 to overcome great physical demand, thus resulting in speeded upregulation of arousal states to  
378 prepare the organism for the future challenge associated with the recent choice. Future studies  
379 may need to employ neuroimaging methods with higher temporal resolution to disambiguate these  
380 two hypotheses. Such studies may also employ pharmacological manipulation to increase NA  
381 tone activity, bio/neuro-feedback with pupil/LC activity, and mental simulation training (Steinmetz,  
382 Tausen, and Risen 2018) to increase arousal in a bottom-up fashion.

383 In our study, future efforts were signaled by the pupil-linked arousal system and dmPFC  
384 activity during choices that preceded actual exertion by about one hour. These results may seem  
385 at odds with those of monkey studies employing LC electrophysiology and NA pharmacology,  
386 which clearly showed effort sensitivity in the NA-system only during force production, but not  
387 during cues just moments prior to the effort (Jahn et al. 2018; Varazzani et al. 2015). The  
388 differences between our results and these datasets may reflect the very different time-periods  
389 separating choices from effort execution: In a paradigm such as ours, where the decisions pertain  
390 to efforts that have to be exerted sometime in the future (within 1 hour), the brain may need to  
391 perform a mental estimation of the amount of resources that will have to be mobilized in order to  
392 make the decision. This kind of simulation may not be needed, or may even be counterproductive,

393 when decisions and exertions occur within seconds of one another. These methodological  
394 differences are not specific to our case but are rather a reflection of the state of the literature:  
395 Many monkey studies presented forced or choice cues that directly preceded actual exertions,  
396 whereas many human studies presented choice cues involving efforts that are delayed or even  
397 hypothetical. We clearly need studies that systematically investigate how the different timecourses  
398 present in these experiments affect effort coding in the NA arousal system and throughout the  
399 brain.

400         What would be the cognitive purpose of imagining or simulating behavior energization  
401 associated with a choice? Such simulation may contribute to metacognitive processes that  
402 evaluate the quality of our ongoing decisions to optimize future decision making (Fleming and Daw  
403 2017). For an example from another domain, there is evidence that actual experience of choice  
404 and success in obtaining a food item influences how we value the food item in the future (Vinckier  
405 et al. 2018). Effort simulation may thus serve as a rich milieu for ‘scene construction’ (Hassabis  
406 and Maguire 2007) in which subjects evaluate the quality of their decision, which has the potential  
407 to shift future valuation. In our context, the source of simulation may include drawing from memory  
408 how much cognitive control needs to be mobilized (Shenhav, Cohen, and Botvinick 2016) in order  
409 to keep exerting physical effort rather than quitting, or retrieving the memory of previously incurred  
410 metabolic signal that accumulated the longer subjects exerted physical effort (Meyniel et al. 2013).  
411 Future experiments may directly test this conjecture by devising mental simulation paradigms in  
412 which participants imagine these specific elements of the force task, namely the sensations of  
413 mental fatigue or pain, and assessing how vividness ratings of these imagined bodily sensations  
414 would correlate with brain activity and choice. Furthermore, a mental simulation paradigm that  
415 manipulates agency might reveal stronger simulation signals for one’s own decisions compared  
416 to experimenter-imposed decisions, which would lend evidence for the use of simulation for self-  
417 evaluation (Fleming and Daw 2017).

418 Irrespective of these considerations, our results highlight that choices may be jointly guided  
419 by DA and NA systems for reward and effort processing, respectively. The majority of effort studies  
420 so far have reported a net value representation (reward discounted by effort) within the core brain  
421 valuation network (Prevost et al. 2010; Aridan et al. 2019) and in dmPFC (Klein-Flügge et al. 2016;  
422 Bernacer et al. 2019; Chong et al. 2017; Prevost et al. 2010; Burke et al. 2013; Arulpragasam et  
423 al. 2018). These fMRI results are consistent with animal data showing reduced willingness to  
424 choose a high-effort/high-reward option when dopamine is depleted (Salamone et al. 2007) and  
425 with the overarching dopaminergic role in motivational reward processing (Walton and Bouret  
426 2019). Our present data concur with these previous studies, in showing reward coding within the  
427 brain valuation network (Prevost et al. 2010; Aridan et al. 2019) and notably NA-linked pupil  
428 dilations and dmPFC brain representations for physical effort (Kurniawan et al. 2013; Meyniel et  
429 al. 2013; Skvortsova, Palminteri, and Pessiglione 2014; Zénon, Sidibé, and Olivier 2014;  
430 Varazzani et al. 2015). This potential “partnership” of DA-coding for reward and NA-coding for  
431 effort does not seem to concur with the classical (but possibly simplistic) view that DA-linked  
432 reward processing is discounted in a subtractive fashion by NA-linked effort cost representations.  
433 We emphasize that our behavioral data and some aspects of our neural results are in line with  
434 previous computational suggestions that an option may be selected based on a trade-off between  
435 reward and effort (Fig 2). However, to our knowledge, prior work in humans has not examined  
436 how the effort sensitivity observed in the NA arousal system directly relates to choice. Here we  
437 were able to scrutinize this functional role using concurrent pupil-fMRI in an effort discounting task.  
438 Our results suggest that NA may play a complementary function to DA. Future studies may build  
439 on our results to further characterize the interaction between DA and NA, using the pupil rate  
440 measure in order to quantify energization signals that guide human decision making.

441 Variations in arousal states (measurable by pupil activity) - such as locomotion and  
442 sleeping - are coupled with oscillatory state changes in brain networks (Takahashi et al. 2010) that  
443 are thought to result from noradrenergic innervation to the cortex (Schwarz et al. 2015). However,

444 there are also observations that arousal states may relate to movement during wakefulness and  
445 REM sleep, which are guided by cholinergic neuromodulatory projections from the basal forebrain  
446 to the cortex (Saper et al. 2010). This raises the concern whether we can truly draw the  
447 conclusions that our arousal effects evident in the pupil signals originate from LC-NA  
448 neuromodulation. While we cannot fully rule out potential effects of cholinergic activity in our study,  
449 a recent analysis with pupil activity and noradrenergic and cholinergic projections shed light on  
450 this issue, demonstrating that pupil rate in mice is more tightly linked with NA projections to the  
451 cortex, whereas activity in the cholinergic pathways more closely matched absolute pupil diameter  
452 (Reimer et al. 2016). Relatedly, a recent pharmacological study using clonidine to upregulate NA  
453 signaling in humans shows increased tonic pupil diameter during task-free intervals (Gelbard-  
454 Sagiv et al. 2018), but unfortunately does not report task-related phasic pupil rate, or a comparison  
455 with cholinergic signalling. Thus, data from mice generally support the view that our effects in pupil  
456 rate may reflect phasic arousal variations that most likely originated from NA-LC activity, but more  
457 investigation in humans are needed to replicate these findings.

458 Our results may have relevance for the diagnosis and therapy of brain disorders with  
459 deficits in motivated behavior. Committing to effort is a first step for success in motivated behaviors  
460 and the inability to commit to effort may bring about a cascade of clinical symptoms of apathy with  
461 a core feature of lack of self-initiated actions (Kurniawan, Guitart-Masip, and Dolan 2011; Husain  
462 and Roiser 2018; Le Heron, Apps., and Husain 2018). Recent neurocomputational work on effort-  
463 reward tradeoffs has identified promising phenotyping approaches of motivation disorders; these  
464 reflect key involvement of the fronto-subcortical circuitry and neuromodulatory systems including  
465 dopamine, serotonin, and noradrenaline (Meyniel et al. 2016; Pessiglione et al. 2018; Berwian et  
466 al. 2020). A specific role for noradrenaline is suggested by the finding that motivation deficits in  
467 depression that are inadequately treated by serotonergic antidepressants – including fatigue and  
468 loss of energy – have been shown to significantly improve following administration of NA (and  
469 dopaminergic) agents (Nutt et al. 2007). This highlights the critical yet overlooked role of NA in

470 motivation regulation in depression (Moret and Briley 2011). Chronic exercise in mice also has  
471 been shown to increase LC-NA derived neuropeptide galanin that later conferred stress resilience  
472 (Tillage et al. 2020), providing further evidence of an adaptive role of NA-related energization  
473 signal. Our study contributes to this large body of work, by showing that the pupil-brain arousal  
474 system is sensitive to deliberations regarding sizable intensities of physical effort. Future work  
475 should further incorporate autonomic arousal and noradrenergic systems in quantitative models  
476 of motivation deficits (Pessiglione et al. 2018), particularly for dissociating arousal effects linked  
477 to anticipated effort from those that may reflect expected reward.

478

479

## 480 **Materials and Methods**

### 481 *Participants*

482 Fifty-two right-handed participants (29 females, mean age=22.3 (3) years) volunteered to  
483 participate in this study. We determined the sample size using power analysis based on the small  
484 to medium effect size ( $d=0.2-0.5$ ) reported in past studies in the laboratory relating pupil size and  
485 biases in choice behavior (Raja Beharelle, et al., in prep; Grueschow et al., in prep). Participants  
486 received between 80-100 CHF (depending on the realized choices and performance) for their  
487 participation. Participants were screened for MRI compatibility, had no neurological or psychiatric  
488 disorders, and needed no visual correction. Data from one subject were excluded because of eye  
489 tracker data loss. Inclusion of this subject in the behavioral analysis did not change the statistical  
490 results, but for consistency, we excluded this data set from all analyses. We then screened  
491 subjects based on their mean choice proportion for the effortful option,  $p(\text{choose effortful})$ , to be  
492 within 0.1 and 0.9, and excluded data from one subject whose choice rate was 0.95. The final N  
493 was 49.

494

### 495 *Procedure*

496 *Force calibration.* Upon arrival, participants were seated in the behavioral testing room, filled the  
497 MRI screening and consent forms, and received general instructions on the force task and MRI  
498 safety. Maximum voluntary force (MVC) level for each hand was obtained by averaging the top  
499 33% force values produced during three 3-s squeezes. Continuous encouragement was given  
500 vocally during each entire squeeze period (e.g., “keep going, keep it up”).

501  
502 *Force training.* Guided by a vertical bar on-screen (Fig. 1B), participants were trained to do hand  
503 squeeze sets at levels 10-90% MVC (displayed as levels 1-9). This dynamometer effort task  
504 mimics a typical hand force exercise at the gym, with a cycle of repetitions (‘reps’) of muscle  
505 contractions (3 s) and relaxations (3 s) for each level. To prevent muscle fatigue, these were done  
506 alternating between left and right hand. During training, one set consisted of 5 repetitions and  
507 there were in total 10 squeeze sets ( $10 \times 5 = 50$  reps) to be evaluated by a certain criterion. Levels  
508 1-8 were presented once, pseudorandomly assigned to either left and right, and level 9 twice,  
509 once for each hand. The order of force levels was also pseudo-randomised. Half of the subjects  
510 practiced on levels 1, 3, 5, 7, 9 with left hand and 2, 4, 6, 8, 9 with right hand, and vice versa for  
511 the other half of subjects. The criterion was to maintain force above the target for at least two of  
512 the 3-s rep (non-consecutively). At the end of each training round, participants received a  
513 summary of their performance and were asked to repeat each unsuccessful force production.  
514 Overall, all participants underwent at most three training rounds ( $M=2.22$ ,  $SD=0.46$ ). After the last  
515 round, 38 participants successfully completed all 50 reps, whereas 11 participants had a few  
516 unsuccessful reps ( $M=4.3\%$ ,  $SD=3.5\%$ ). These results suggest that the training was very  
517 successful.

518 Following a 5-minute break, they proceeded with a subjective rating task in which they had  
519 to squeeze for each hand once at levels 1, 3, 5, and 9 for 5 s without knowing the difficulty levels.  
520 They were told that in some trials it would be easy to raise the bar to reach the target, which in  
521 this task was always displayed at the midline, while in other trials it would be harder to do it. After

522 each 5-s squeeze, they then rated on a continuous visual analogue scale how effortful the grip  
523 was for them. They were instructed that the leftmost and rightmost point in the scale should refer  
524 to level 0 (merely holding the dynamometer) and level 10, respectively. The force training was  
525 successful as indicated by a close relationship between subjective and objective effort, mean  
526 pearson's  $r=0.93$ ,  $SEM=0.0073$ ,  $t(46)=127.63$ ,  $p<0.0001$ .

527 Prior to scanning, participants made five practice decisions and we made sure that  
528 participants fully comprehended the task. The effort discounting task was done in the fMRI  
529 scanner. Participants were aware that the effort they were considering now consisted of one set  
530 of 10 reps (instead of 5). To prevent participants from taking decisions based on anticipated  
531 muscle fatigue, only a random selection of eight decisions were actually realized in the behavioral  
532 testing room after the scan, and participants were fully aware of this. Participants then filled some  
533 questionnaires, were debriefed, given payment, and thanked for their participation before leaving  
534 the lab.

535

### 536 *Effort discounting task*

537 In the scanner, participants were given a series of choices between an effortful and a non-effortful  
538 option. On each trial, the effortful option entailed varying effort (1 of 6 levels, levels 4-9) and reward  
539 amounts (1 of 6 levels, 0.5-10 CHF; Fig. 2A). The non-effortful option entailed minimal effort (fixed  
540 at level 1) and a lower reward amount (30 or 40% of the reward amount of the effortful option). To  
541 rule out risk as a potential confound (namely that accepting a level 9 offer gives a higher risk of  
542 task failure compared to accepting a level 4) we ensured that the effort training at all levels was  
543 successful (overall failure rate during training,  $M=0.9\%$ ,  $SD=2.4\%$ ),

544 We used a factorial design with six effort and six reward levels (36 cells) for the effortful  
545 option, and two reward levels for the non-effortful option. There were 3 trials in each cell, resulting  
546 in  $6 \times 6 \times 2 \times 3 = 216$  trials. Trials were split in three fMRI runs of 72 trials (9 mins) and trial order  
547 was pseudorandomised per subject and run. The non-effortful option entailed effort fixed at Level

548 1 and smaller rewards (30-40% of the larger reward), giving a clear incentive to choose the non-  
549 effortful option if the larger effort was not worth the reward.

550 During a fixation period of 3-6 s (drawn from a gamma distribution with shape parameter  
551 0.8 and scale parameter 1, mean 3.7s), the text indicating reward and effort levels was masked  
552 with a series of letters “X” (Fig. 1A). Following this period, the colour of the + sign at the centre  
553 changed and the effort and reward of each of the two options were presented on either side of the  
554 fixation point for a fixed duration of 3 s. This prompted the subjects that they were able to press  
555 either the left or the right key to indicate their choice. To provide decision feedback, this key  
556 response was promptly followed by a change in colour for the selected option. Regardless of key  
557 press, the stimuli remained on-screen for 3 s before the next fixation period was presented. If  
558 participants failed to respond during this period, the trial was coded as missing and no reward was  
559 gained. Amongst 49 participants, 13 had 1 missing trial, 5 had 2-5 missing trials, and 1 had 34  
560 (15%) missing trials. Exclusion of this last subject did not change any result, so we decided to  
561 include them.

562

### 563 *Pupillometry*

564 Participants’ right or left eye (depending on feasibility) was monitored using MR-compatible  
565 infrared EYELink 1000 eye-tracker system (SR Research Ltd.) with 500 ms sampling rate.  
566 Participants were instructed not to blink during the presentation of the options. Pre-processing of  
567 the pupil data was performed in MATLAB (version 2017a, MathWorks, Natick, USA). Data  
568 indicating eye blinks were replaced using linear interpolation. The data were visually inspected to  
569 ensure that all artefacts had been successfully removed. Pupil data were z-transformed within  
570 each run to control for variability across runs and across subjects. Pupil rate of dilation (unit: z/s),  
571 our measure of arousal, was calculated by subtracting pupil size at button response from pupil  
572 size at stimulus onset, divided by RT. Pre-trial pupil baseline level (PBL) was calculated by  
573 averaging pupil size from 500ms - 1ms before stimulus onset.



574 To ensure constant screen luminance level, we kept roughly the same number of pixels  
575 throughout the events by replacing the text indicating reward and effort levels with a series of Xs  
576 and by using text hues that were isoluminant to the grey background (RGB grey: 178.5, 178.5,  
577 178.5; green: 50, 100, 10; purple: 118, 60, 206; blue: 53 77 229). Ensuring readability, we selected  
578 these hues out of 17 theoretically isoluminant hues where relative luminance was calculated as a  
579 linear combination of the red, green, and blue components based on the formula:  $Y = 0.2126 R +$   
580  $0.7152 G + 0.0722 B$ . This formula follows the function that green light contributes the most to  
581 perceived intensity while blue contributes the least (Stokes, et al.;  
582 <https://www.w3.org/Graphics/Color/sRGB>). Green was always fixed as the base hue and blue and  
583 purple were randomly assigned trial-by-trial to highlight the selected offer (Fig. 1A).

584 Additionally, in a control experiment, we recorded luminance-driven pupil dilation without  
585 any cognitive task during presentation of fixation screens with a series of Xs as fixation period and  
586 Ys to replace the text that would have indicated the effort and reward levels in the main  
587 experiment, each period lasting for 3 s. Participants were instructed to keep their eyes open but  
588 were not required to press any key. Just like in the main experiment, green was the base hue  
589 during fixation whereas blue and purple were used to highlight the text on one side of the screen.  
590 All stimuli were in the same text format as in the main task (Fig. 1). Order of hue and side  
591 assignment were all counterbalanced and pseudorandomised. We found no difference in mean  
592 pupil diameter during the presentation of these control stimuli in different hues, confirming that the  
593 pupil response in the main task was not driven by differences in text luminance (Fig. S1).

594  
595 *fMRI acquisition and analysis*

596 Functional imaging was performed on a Philips Achieva 3T whole-body MR scanner equipped  
597 with a 32-channel MR head coil. Each experimental run contained 225-244 volumes (voxel size,  
598 3x3x3 mm<sup>3</sup>; 0.5 mm gap; matrix size, 80x78 (FoV: [240 140 (FH) 240]; TR/TE 2334/30 ms; flip  
599 angle, 90°; parallel imaging factor, 1.5; 40 slices acquired in ascending order for full coverage of

600 the brain). We also acquired T1-weighted multislice gradient-echo B0 scans which were used for  
601 correction of deformations (voxel size, 3 x 3 x3 mm<sup>3</sup>; 0.75 mm gap; matrix size, 80x80;  
602 TR/TE1/TE2 // 400/4.3/7.4 ms; flip angle, 44°; parallel imaging; 40 slices). Additionally, we  
603 acquired a high-resolution T1- weighted 3D fast-field echo structural scan used for image  
604 registration during postprocessing (170 sagittal slices; matrix size, 256x256; voxel size, 1x1x1  
605 mm<sup>3</sup>; TR/TE/TI // 8.3/3.9/1098 ms).

606 We used Statistical Parametric Mapping (SPM12; Wellcome Trust Centre for  
607 Neuroimaging, London, <http://www.fil.ion.ucl.ac.uk/spm>) for imaging analyses. Five preprocessing  
608 steps included (1) realignment and unwarping, (2) slice-timing correction, (3) coregistration and  
609 normalization, (4) smoothing, and (5) correction for physiological noise. First, we re-aligned all  
610 functional volumes to the first volume to correct for inter-scan movement. Images were unwarped  
611 using field maps to remove unwanted variance due to field inhomogeneity (Andersson et al.,  
612 2001). Second, unwarped functional images were slice-time corrected (to the acquisition time of  
613 the middle slice). Third, each subjects' T1 image was co-registered (as reference image) with the  
614 mean functional image (as source image) using segmentation parameters performed on both  
615 images (Ashburner and Friston, 2004). These images were then normalized using the inverse  
616 deformation procedure and spatially re-sampled to 3 mm isotropic voxels. Fourth, all images were  
617 smoothed using a Gaussian kernel (FWHM 8mm). Finally, we performed correction for  
618 physiological noise via RETROICOR (Glover et al., 2000; Hutton et al., 2011) using Fourier  
619 expansions of different order for the estimated phases of cardiac pulsation (3rd order), respiration  
620 (4th order) and cardio-respiratory interactions (1st order) (Hutton et al., 2011). We created the  
621 corresponding confound regressors using the PhysIO Toolbox (Kasper et al., 2009)  
622 (<https://www.translationalneuromodeling.org/tapas>).

623 We performed random-effect, event- related statistical analyses. For each subject, we first  
624 computed a statistical general linear model (GLM) by convolving series of stick functions (time-  
625 locked to the stimulus onsets and with the trial-wise RT as each event's duration) with the

626 canonical hemodynamic response functions and their first derivatives (temporal derivative). We  
627 also added to these GLMs 18 physiological regressors and 6 motion parameters. At the second  
628 level, we then tested the significance of subject-specific effects (as tested by t-contrasts at the first  
629 level) across the population. For these analyses, we used a grey matter mask as an explicit mask,  
630 created by averaging across subjects and smoothing (8mm) all participants' normalized grey  
631 matter images (wc1\*.nii) from the 'segment' procedure.

632 We built two first level GLMs without any orthogonalization. To identify unique variance  
633 associated with each of our trial parameters, we generated GLM1 using the stimulus onset as a  
634 single regressor with choice (1: effortful, -1: non-effortful), reward and effort levels of the effortful  
635 option, RT, pupil rate, and effort-by-choice (all non-binary variables were z-scored) as trial-wise  
636 parametric modulators. We then entered the contrast images of each parametric modulator vs  
637 baseline into second level one-sample t-tests. To illustrate the effort-by-choice interaction effect,  
638 we generated GLM2 with two regressors containing the stimulus onsets for choose effortful and  
639 choose non-effortful trials. Each regressor contained reward and effort levels of the effortful option,  
640 RT and pupil rate (all z-scored) as trial-wise parametric modulators. We then entered the contrast  
641 images of the effort parametric modulator for [choose effortful > choose non-effortful] into second  
642 level one-sample t-tests.

643

## 644 **Statistics**

645 Statistical analyses for behavioral and pupil data were done with MATLAB 2017  
646 ([www.mathworks.com](http://www.mathworks.com)). We conducted (multiple) logistic or linear regressions separately for each  
647 participant and entered the regression weights of each predictor from all participants into a one-  
648 sample t-test. All continuous predictors were z-scored across trials within each participant. This  
649 approach allows for the intercept (constant) to vary across participants. Goodness-of-fit is the  
650 adjusted  $R^2$  for regressions. We used robust regression to evaluate the association between two  
651 variables. All statistical tests were two-tailed. For inference about the brain data, we used a cluster-

652 defining threshold of  $p < 0.001$  and only report suprathreshold voxels that survive cluster-level  
653 family-wise error (FWE) corrected  $p < 0.05$ .

654

655

656 **Table 1. MNI coordinates and statistics for GLM1: effort-by-choice, choice, reward,**  
 657 **effort, pupil rate, and RT modulation.** All effects are from t-tests. *P* values are at cluster-  
 658 level FWE correction.

| Effect                                    | Brain region                | k     | t-value | p-value | MNI Coordinates |     |     |
|-------------------------------------------|-----------------------------|-------|---------|---------|-----------------|-----|-----|
|                                           |                             |       |         |         | x               | y   | z   |
| Effort-by-choice<br>(positive modulation) | L Superior Medial Gyrus     | 301   | 5.324   | <0.0001 | -3              | 18  | 45  |
|                                           | L ACC                       |       | 4.786   |         | -6              | 27  | 27  |
| Effort-by-choice<br>(negative modulation) | L Postcentral Gyrus         | 4085  | 6.382   | <0.0001 | -33             | -42 | 57  |
|                                           | R Superior Frontal Gyrus    |       | 6.248   |         | 24              | -6  | 66  |
|                                           | R Postcentral Gyrus         | 6.242 | 30      | -42     | 57              |     |     |
|                                           | L Middle Temporal Gyrus     | 147   | 4.688   | 0.009   | -60             | -30 | -3  |
|                                           | L Middle Temporal Gyrus     |       | 4.151   |         | -57             | -51 | -6  |
| Choice (Effortful > non-effortful)        | L Middle Frontal Gyrus      | 146   | 4.749   | 0.02    | -30             | 30  | 36  |
| Choice (Non-effortful > effortful)        | no supra-threshold clusters |       |         |         |                 |     |     |
| Reward (positive modulation)              | L Caudate Nucleus           | 1320  | 7.417   | <0.0001 | -9              | 9   | 0   |
|                                           | R IFG (p. Orbitalis)        |       | 6.752   |         | 36              | 21  | -9  |
|                                           | L IFG (p. Orbitalis)        |       | 5.662   |         | -30             | 24  | -3  |
|                                           | R Middle Frontal Gyrus      | 464   | 7.237   | <0.0001 | 39              | 21  | 27  |
|                                           | L Inferior Parietal Lobule  | 1046  | 6.61    | <0.0001 | -36             | -63 | 51  |
|                                           | L Precuneus                 |       | 4.949   |         | -3              | -66 | 42  |
|                                           | L Middle Occipital Gyrus    |       | 4.948   |         | -30             | -78 | 27  |
|                                           | R Middle Temporal Gyrus     | 211   | 5.767   | 0.003   | 60              | -30 | -6  |
|                                           | R Middle Temporal Gyrus     |       | 3.781   |         | 57              | -9  | -18 |
|                                           | R Fusiform Gyrus            | 900   | 5.57    | <0.0001 | 24              | -81 | -9  |
|                                           | L Fusiform Gyrus            |       | 5.044   |         | -24             | -78 | -9  |
|                                           | L Cerebellum (Crus 2)       |       | 5.018   |         | -12             | -81 | -27 |
|                                           | L Middle Temporal Gyrus     | 149   | 5.489   | 0.012   | -60             | -21 | -15 |
|                                           | L Superior Frontal Gyrus    | 478   | 5.06    | <0.0001 | -21             | 36  | 48  |
|                                           | L IFG (p. Triangularis)     |       | 4.857   |         | -39             | 21  | 24  |
| L Middle Frontal Gyrus                    | 4.756                       |       | -36     |         | 12              | 57  |     |

|                                  |                                  |                         |       |         |      |     |     |
|----------------------------------|----------------------------------|-------------------------|-------|---------|------|-----|-----|
|                                  | L Superior Orbital Gyrus         | 115                     | 5.021 | 0.03    | -30  | 51  | 3   |
|                                  | R Inferior Parietal Lobule       | 597                     | 4.922 | <0.0001 | 33   | -72 | 24  |
|                                  | R Inferior Parietal Lobule       |                         | 4.839 |         | 39   | -60 | 48  |
|                                  | R Middle Temporal Gyrus          |                         | 4.706 |         | 54   | -48 | 12  |
|                                  | L ACC                            | 167                     | 4.484 | 0.007   | -6   | 42  | 12  |
| Reward (negative modulation)     | no supra-threshold clusters      |                         |       |         |      |     |     |
| Effort (positive modulation)     | R Rolandic Operculum             | 151                     | 5.503 | 0.008   | 48   | 3   | 12  |
|                                  | L Linual Gyrus                   | 365                     | 4.482 | <0.0001 | -15  | -84 | 3   |
|                                  | L Middle Occipital Gyrus         |                         | 4.352 |         | -30  | -90 | 15  |
|                                  | L Calcarine Gyrus                |                         | 4.073 |         | 3    | -75 | 15  |
|                                  | R Calcarine Gyrus                | 117                     | 4.313 | 0.022   | 30   | -69 | 15  |
| Effort (negative modulation)     | no supra-threshold clusters      |                         |       |         |      |     |     |
| Pupil rate (positive modulation) | R Precuneus                      | 8334                    | 7.993 | <0.0001 | 6    | -78 | 42  |
|                                  | L Calcarine Gyrus                |                         | 7.485 |         | -3   | -90 | 0   |
|                                  | R Superior Frontal Gyrus         | 1081                    | 6.774 | <0.0001 | 21   | -9  | 69  |
|                                  | R Middle Frontal Gyrus           |                         | 6.639 |         | 45   | -9  | 57  |
|                                  | L Posterior-Medial Frontal       |                         | 6.041 |         | -18  | -12 | 72  |
|                                  | R Temporal Pole                  | 307                     | 6.500 | <0.0001 | 54   | 15  | -6  |
|                                  | R Insula Lobe                    |                         | 4.806 |         | 36   | 9   | 12  |
|                                  | L Rectal Gyrus                   | 287                     | 5.715 | <0.0001 | -15  | 12  | -9  |
|                                  | R Caudate Nucleus                |                         | 4.519 |         | 9    | 6   | 3   |
|                                  | R Olfactory cortex               |                         | 4.220 |         | 21   | 9   | -15 |
|                                  | L Temporal Pole                  | 225                     | 4.854 | 0.001   | -57  | 9   | -3  |
|                                  | L IFG (p. Opercularis)           |                         | 4.283 |         | -42  | 9   | 15  |
|                                  | L IFG (p. Orbitalis)             |                         | 3.563 |         | -30  | 27  | -3  |
|                                  | R Superior Temporal Gyrus        | 138                     | 4.600 | 0.013   | 57   | -39 | 27  |
|                                  | Pupil rate (negative modulation) | L Middle Temporal Gyrus | 123   | 5.914   | 0.02 | -51 | -36 |
| L Inferior Temporal Gyrus        |                                  |                         | 3.581 |         | -60  | -12 | -21 |
| L Angular Gyrus                  |                                  | 196                     | 5.628 | 0.003   | -54  | -63 | 36  |
| L Superior Medial Gyrus          |                                  | 280                     | 5.168 | <0.0001 | -6   | 48  | 45  |
| R Superior Medial Gyrus          |                                  |                         | 4.652 |         | 3    | 30  | 60  |
| L Middle Frontal Gyrus           |                                  | 96                      | 4.703 | 0.044   | -33  | 24  | 51  |

|                          |                          |       |        |         |     |     |    |
|--------------------------|--------------------------|-------|--------|---------|-----|-----|----|
| RT (positive modulation) | L Cuneus                 | 273   | 7.335  | 0.001   | 3   | -93 | 24 |
|                          | R Cuneus                 |       | 6.818  |         | 6   | -84 | 42 |
|                          | R Paracentral Lobule     |       | 6.657  |         | 6   | -48 | 75 |
|                          | R IFG (p. Orbitalis)     | 219   | 5.795  | 0.003   | 45  | 36  | 0  |
| RT (negative modulation) | R Fusiform Gyrus         | 11871 | 14.006 | <0.0001 | 36  | -75 | -9 |
|                          | L Fusiform Gyrus         |       | 12.751 |         | -36 | -69 | -9 |
|                          | L Middle Occipital Gyrus |       | 11.346 |         | -36 | -87 | 6  |
|                          |                          |       |        |         |     |     |    |

659

660

## 661 **Acknowledgments**

662 **General:** The authors thank Yoojin Lee and Zoltan Nagy for assistance in MRI optimisation, Karl  
663 Treiber and Miguel A. Garcia for assistance in data collection, and our participants for their  
664 voluntary participation. **Funding:** This project has received funding from the European Union's  
665 Horizon 2020 research and innovation programme under the Marie Skłodowska-Curie grant  
666 agreement No 702799 to I.K. and by a grant from the Swiss National Science Foundation SNSF  
667 (100019L\_173248) to C.C.R.. **Author contributions:** I.K. and C.C.R. conceived and designed  
668 the experiment. I.K. carried out the experiment. I.K. conducted all analyses with input from M.G.  
669 and C.C.R.. M.G. provided analytical software. I.K., M.G., and C.C.R. interpreted the results and  
670 wrote the manuscript. **Data availability:** All raw and processed data, as well as the code to  
671 reproduce all analyses and figures will be made available on github or the OSF upon publication.

672

673 **Competing interests:** The authors declare no competing interests.

674

675

676

677

678

679

680

## 681 References

- 682
- 683 Aridan, Nadav, Nicholas J. Malecek, Russell A. Poldrack, and Tom Schonberg. 2019. "Neural Correlates  
684 of Effort-Based Valuation with Prospective Choices." *NeuroImage* 185 (July 2018): 446–54.  
685 <https://doi.org/10.1016/j.neuroimage.2018.10.051>.
- 686 Arnsten, A. F.T., and P. S. Goldman-Rakic. 1984. "Selective Prefrontal Cortical Projections to the Region  
687 of the Locus Coeruleus and Raphe Nuclei in the Rhesus Monkey." *Brain Research* 306 (1–2): 9–18.  
688 [https://doi.org/10.1016/0006-8993\(84\)90351-2](https://doi.org/10.1016/0006-8993(84)90351-2).
- 689 Arulpragasam, Amanda R., Jessica A. Cooper, Makiah R. Nuutinen, and Michael T. Treadway. 2018.  
690 "Corticoinsular Circuits Encode Subjective Value Expectation and Violation for Effortful Goal-  
691 Directed Behavior." *Proceedings of the National Academy of Sciences* 115 (22): E5233–42.  
692 <https://doi.org/10.1073/pnas.1800444115>.
- 693 Aston-Jones, Gary, and Jonathan D. Cohen. 2005. "An Integrative Theory of Locus Coeruleus -  
694 Norepinephrine Function: Adaptive Gain and Optimal Performance." *Annual Review of Neuroscience*  
695 28 (1): 403–50. <https://doi.org/10.1146/annurev.neuro.28.061604.135709>.
- 696 Bartra, Oscar, Joseph T. McGuire, and Joseph W Kable. 2013. "The Valuation System: A Coordinate-  
697 Based Meta-Analysis of BOLD fMRI Experiments Examining Neural Correlates of Subjective Value."  
698 *NeuroImage* 76 (August): 412–27. <https://doi.org/10.1016/j.neuroimage.2013.02.063>.
- 699 Bautista, Luis M, Joost Tinbergen, and Alex Kacelnik. 2001. "To Walk or to Fly? How Birds Choose among  
700 Foraging Modes." *Proc. Natl. Acad. Sci. U.S.A.* 98: 1089–94.
- 701 Beierholm, Ulrik, Marc Guitart-Masip, Marcos Economides, Rumana Chowdhury, Emrah Düzel, Ray  
702 Dolan, and Peter Dayan. 2013. "Dopamine Modulates Reward-Related Vigor."  
703 *Neuropsychopharmacology* 38 (8): 1495–1503. <https://doi.org/10.1038/npp.2013.48>.
- 704 Benoit, Roland G, Sam J Gilbert, and Paul W Burgess. 2011. "A Neural Mechanism Mediating the Impact  
705 of Episodic Prospection on Farsighted Decisions." *Journal of Neuroscience* 31 (18): 6771–79.  
706 <https://doi.org/10.1523/JNEUROSCI.6559-10.2011>.
- 707 Bernacer, Javier, Ivan Martinez-Valbuena, Martin Martinez, Nuria Pujol, Elkin Luis, David Ramirez -  
708 Castillo, and Maria A. Pastor. 2019. "Neural Correlates of Effort-Based Behavioral Inconsistency."  
709 *Cortex* 113 (Imim): 96–110. <https://doi.org/10.1016/j.cortex.2018.12.005>.
- 710 Berwian, IM;, J; Wenzel, AGE; Collins, E; Seifritz, KE; Stephan, H; Walter, and QJM; Huys. 2020.  
711 "Computational Mechanisms of Effort and Reward Decisions in Depression and Their Relationship to  
712 Relapse after Antidepressant Discontinuation." *JAMA Psychiatry*, In Press.  
713 <https://doi.org/10.1001/jamapsychiatry.2019.4971>.
- 714 Borderies, Nicolas, Pauline Bornert, Sophie Gilardeau, and Sebastien Bouret. 2020. "Pharmacological  
715 Evidence for the Implication of Noradrenaline in Effort." *PLoS Biology* 18 (10): 1–26.  
716 <https://doi.org/10.1101/714923>.
- 717 Bulley, Adam, and Matthew J. Gullo. 2017. "The Influence of Episodic Foresight on Delay Discounting and  
718 Demand for Alcohol." *Addictive Behaviors*. <https://doi.org/10.1016/j.addbeh.2016.11.003>.
- 719 Burke, Christopher J, Christian Brünger, Thorsten Kahnt, Soyoung Q Park, and Philippe N Tobler. 2013.  
720 "Neural Integration of Risk and Effort Costs by the Frontal Pole: Only upon Request." *Journal of*  
721 *Neuroscience* 33 (4): 1706–13. <https://doi.org/10.1523/JNEUROSCI.3662-12.2013>.
- 722 Chandler, Daniel J., Carolyn S. Lamperski, and Barry D. Waterhouse. 2013. "Identification and Distribution  
723 of Projections from Monoaminergic and Cholinergic Nuclei to Functionally Differentiated Subregions  
724 of Prefrontal Cortex." *Brain Research* 1522 (July): 38–58.  
725 <https://doi.org/10.1016/j.brainres.2013.04.057>.
- 726 Chong, Trevor T.-J., Matthew Apps, Kathrin Giehl, Annie Sillence, Laura L. Grima, and Masud Husain.  
727 2017. "Neurocomputational Mechanisms Underlying Subjective Valuation of Effort Costs." Edited by  
728 Ben Seymour. *PLOS Biology* 15 (2): e1002598. <https://doi.org/10.1371/journal.pbio.1002598>.
- 729 Cole, Michael W., Jeremy R. Reynolds, Jonathan D. Power, Grega Repovs, Alan Anticevic, and Todd S.  
730 Braver. 2013. "Multi-Task Connectivity Reveals Flexible Hubs for Adaptive Task Control." *Nature*  
731 *Neuroscience* 16 (9): 1348–55. <https://doi.org/10.1038/nn.3470>.
- 732 Dalsass, M., Sanford Kiser, Margaret Mendershausen, and D. C. German. 1981. "Medial Prefrontal  
733 Cortical Projections to the Region of the Dorsal Periventricular Catecholamine System."  
734 *Neuroscience*. [https://doi.org/10.1016/0306-4522\(81\)90149-4](https://doi.org/10.1016/0306-4522(81)90149-4).
- 735 Dassen, Fania C.M. M, Anita Jansen, Chantal Nederkoorn, and Katrijn Houben. 2016. "Focus on the  
736 Future: Episodic Future Thinking Reduces Discount Rate and Snacking." *Appetite* 96: 327–32.  
737 <https://doi.org/10.1016/j.appet.2015.09.032>.



- 738 Dosenbach, Nico U.F., Damien A. Fair, Alexander L. Cohen, Bradley L. Schlaggar, and Steven E.  
739 Petersen. 2008. "A Dual-Networks Architecture of Top-down Control." *Trends in Cognitive Sciences*  
740 12 (3): 99–105. <https://doi.org/10.1016/j.tics.2008.01.001>.
- 741 Ebitz, R. Becket, and Michael L. Platt. 2015. "Neuronal Activity in Primate Dorsal Anterior Cingulate  
742 Cortex Signals Task Conflict and Predicts Adjustments in Pupil-Linked Arousal." *Neuron* 85 (3): 628–  
743 40. <https://doi.org/10.1016/j.neuron.2014.12.053>.
- 744 Fleming, Stephen Michael, and Nathaniel D Daw. 2017. "Self-Evaluation of Decision-Making: A General  
745 Bayesian Framework for Metacognitive Computation." *Psychological Review* 124 (1): 91–114.  
746 <https://doi.org/10.1037/rev0000045>.
- 747 Gaesser, Brendan, Kerri Keeler, and Liane Young. 2018. "Moral Imagination: Facilitating Prosocial  
748 Decision-Making through Scene Imagery and Theory of Mind." *Cognition* 171 (February): 180–93.  
749 <https://doi.org/10.1016/j.cognition.2017.11.004>.
- 750 Gee, Jan Willem de, Olympia Colizoli, Niels A. Kloosterman, Tomas Knapen, Sander Nieuwenhuis, and  
751 Tobias H. Donner. 2017. "Dynamic Modulation of Decision Biases by Brainstem Arousal Systems."  
752 *ELife* 6 (Lc): 1–36. <https://doi.org/10.7554/eLife.23232>.
- 753 Gee, Jan Willem de, Tomas Knapen, and Tobias H Donner. 2014. "Decision-Related Pupil Dilation  
754 Reflects Upcoming Choice and Individual Bias." *Proceedings of the National Academy of Sciences*  
755 *of the United States of America* 111 (5): E618-25. <https://doi.org/10.1073/pnas.1317557111>.
- 756 Gelbard-Sagiv, Hagar, Efrat Magidov, Haggai Sharon, Talma Hendler, and Yuval Nir. 2018.  
757 "Noradrenaline Modulates Visual Perception and Late Visually Evoked Activity." *Current Biology* 28  
758 (14): 2239-2249.e6. <https://doi.org/10.1016/j.cub.2018.05.051>.
- 759 Glimcher, Paul W. 2009. "Choice: Towards a Standard Back-Pocket Model." In *Neuroeconomics: Decision*  
760 *Making and the Brain*, edited by Paul W. Glimcher, Colin F. Camerer, Ernst Fehr, and Russell A.  
761 Poldrack, First, 503–21. London: Academic Press. [https://doi.org/10.1016/B978-0-12-374176-](https://doi.org/10.1016/B978-0-12-374176-9.00032-4)  
762 [9.00032-4](https://doi.org/10.1016/B978-0-12-374176-9.00032-4).
- 763 Goodale, Melvyn A., and A. David Milner. 2018. "Separate Visual Pathways for Perception and Action."  
764 *Human Perception: Institutional Performance and Reform in Australia*, no. I: 123–28.  
765 <https://doi.org/10.4324/9781351156288-16>.
- 766 Grueschow, Marcus, Birgit Kleim, and Christian C. Ruff. 2020. "Role of the Locus Coeruleus Arousal  
767 System in Cognitive Control." *Journal of Neuroendocrinology*, no. July: 1–11.  
768 <https://doi.org/10.1111/jne.12890>.
- 769 Hassabis, Demis, and Eleanor A. Maguire. 2007. "Deconstructing Episodic Memory with Construction."  
770 *Trends in Cognitive Sciences*. <https://doi.org/10.1016/j.tics.2007.05.001>.
- 771 Hauser, Tobias U., Eran Eldar, and Raymond J. Dolan. 2017. "Separate Mesocortical and Mesolimbic  
772 Pathways Encode Effort and Reward Learning Signals." *Proceedings of the National Academy of*  
773 *Sciences*, 201705643. <https://doi.org/10.1073/pnas.1705643114>.
- 774 Heron, C. Le, M. A.J. Apps., and M. Husain. 2018. "The Anatomy of Apathy: A Neurocognitive Framework  
775 for Amotivated Behaviour." *Neuropsychologia* 118 (May 2017): 54–67.  
776 <https://doi.org/10.1016/j.neuropsychologia.2017.07.003>.
- 777 Hockey, G. Robert, J. 1997. "Compensatory Control in the Regulation of Human Performance under  
778 Stress and High Workload: A Cognitive-Energetical Framework." *Biological Psychology* 45 (1–3):  
779 73–93. [https://doi.org/10.1016/S0301-0511\(96\)05223-4](https://doi.org/10.1016/S0301-0511(96)05223-4).
- 780 Hull, C. L. 1943. *Principles of Behavior: An Introduction to Behavior Theory*. New York: Appleton-Century-  
781 Crofts.
- 782 Husain, Masud, and Jonathan P. Roiser. 2018. "Neuroscience of Apathy and Anhedonia: A  
783 Transdiagnostic Approach." *Nature Reviews Neuroscience* 19 (8): 470–84.  
784 <https://doi.org/10.1038/s41583-018-0029-9>.
- 785 Jahn, Caroline I., Sophie Gilardeau, Chiara Varazzani, Bastien Blain, Jerome Sallet, Mark E. Walton, and  
786 Sebastien Bouret. 2018. "Dual Contributions of Noradrenaline to Behavioural Flexibility and  
787 Motivation." *Psychopharmacology* 235 (9): 2687–2702. <https://doi.org/10.1007/s00213-018-4963-z>.
- 788 Joshi, Siddhartha, Yin Li, Rishi M. Kalwani, and Joshua I. Gold. 2016. "Relationships between Pupil  
789 Diameter and Neuronal Activity in the Locus Coeruleus, Colliculi, and Cingulate Cortex." *Neuron* 89  
790 (1): 221–34. <https://doi.org/10.1016/j.neuron.2015.11.028>.
- 791 Kiani, Roozbeh, Leah Corthell, and Michael N. Shadlen. 2014. "Choice Certainty Is Informed by Both  
792 Evidence and Decision Time." *Neuron*. <https://doi.org/10.1016/j.neuron.2014.12.015>.
- 793 Klein-Flügge, Miriam Cornelia, Steven W. Kennerley, Karl Friston, and Sven Bestmann. 2016. "Neural  
794 Signatures of Value Comparison in Human Cingulate Cortex during Decisions Requiring an Effort-

- 795 Reward Trade-Off." *Journal of Neuroscience* 36 (39): 10002–15.  
796 <https://doi.org/10.1523/JNEUROSCI.0292-16.2016>.
- 797 Kurniawan, Irma Triasih, Marc Guitart-Masip, P. Dayan, and Raymond J. Dolan. 2013. "Effort and  
798 Valuation in the Brain: The Effects of Anticipation and Execution." *Journal of Neuroscience* 33 (14):  
799 6160–69. <https://doi.org/10.1523/JNEUROSCI.4777-12.2013>.
- 800 Kurniawan, Irma Triasih, Marc Guitart-Masip, and Raymond J. Dolan. 2011. "Dopamine and Effort-Based  
801 Decision Making." *Frontiers in Decision Neuroscience* 5 (81): 1–10.  
802 <https://doi.org/10.3389/fnins.2011.00081>.
- 803 Kurniawan, Irma Triasih, Ben Seymour, Deborah Talmi, Wako Yoshida, Nick Chater, and Raymond J.  
804 Dolan. 2010. "Choosing to Make an Effort: The Role of Striatum in Signaling Physical Effort of a  
805 Chosen Action." *Journal of Neurophysiology* 104 (1): 313–21. <https://doi.org/10.1152/jn.00027.2010>.
- 806 McGinley, Matthew J., Martin Vinck, Jacob Reimer, Renata Batista-Brito, Edward Zagher, Cathryn R.  
807 Cadwell, Andreas S. Tolias, Jessica A. Cardin, and David A. McCormick. 2015. "Waking State:  
808 Rapid Variations Modulate Neural and Behavioral Responses." *Neuron* 87 (6): 1143–61.  
809 <https://doi.org/10.1016/j.neuron.2015.09.012>.
- 810 McGuire, Joseph T., and Matthew M Botvinick. 2010. "Prefrontal Cortex, Cognitive Control, and the  
811 Registration of Decision Costs." *Proceedings of the National Academy of Sciences of the United*  
812 *States of America* 107 (17): 7922–26. <https://doi.org/10.1073/pnas.0910662107>.
- 813 Meyniel, Florent, Guy M. Goodwin, J. F. William Deakin, Corinna Klinge, Christine Macfadyen, Holly  
814 Milligan, Emma Mullings, Mathias Pessiglione, and Raphaël Gaillard. 2016. "A Specific Role for  
815 Serotonin in Overcoming Effort Cost." *ELife* 5 (NOVEMBER2016): 1–18.  
816 <https://doi.org/10.7554/eLife.17282>.
- 817 Meyniel, Florent, Claire Sergent, Lionel Rigoux, Jean Daunizeau, and Mathias Pessiglione. 2013.  
818 "Neurocomputational Account of How the Human Brain Decides When to Have a Break."  
819 *Proceedings of the National Academy of Sciences of the United States of America* 110 (7): 2641–46.  
820 <https://doi.org/10.1073/pnas.1211925110>.
- 821 Moret, Chantal, and Mike Briley. 2011. "The Importance of Norepinephrine in Depression."  
822 *Neuropsychiatric Disease and Treatment* 7 (SUPPL.): 9–13. <https://doi.org/10.2147/NDT.S19619>.
- 823 Murphy, Peter R., Joachim Vandekerckhove, and Sander Nieuwenhuis. 2014. "Pupil-Linked Arousal  
824 Determines Variability in Perceptual Decision Making." *PLoS Computational Biology* 10 (9).  
825 <https://doi.org/10.1371/journal.pcbi.1003854>.
- 826 Niv, Yael, Nathaniel D Daw, and Peter Dayan. 2005. "How Fast to Work : Response Vigor , Motivation and  
827 Tonic Dopamine." In *Neural Information Processing Systems*, edited by Y Weiss, B Scholkopf, and J  
828 Platt, 1019–26. MIT Press.
- 829 Nutt, David, Koen Demyttenaere, Zoltan Janka, Trond Aarre, Michel Bourin, Pier Luigi Canonico, Jose  
830 Luis Carrasco, and Steven Stahl. 2007. "The Other Face of Depression, Reduced Positive Affect:  
831 The Role of Catecholamines in Causation and Cure." *Journal of Psychopharmacology* 21 (5): 461–  
832 71. <https://doi.org/10.1177/0269881106069938>.
- 833 Ostlund, Sean B., K. M. Wassum, N. P. Murphy, Bernard W. Balleine, and N. T. Maidment. 2011.  
834 "Extracellular Dopamine Levels in Striatal Subregions Track Shifts in Motivation and Response Cost  
835 during Instrumental Conditioning." *Journal of Neuroscience* 31 (1): 200–207.  
836 <https://doi.org/10.1523/JNEUROSCI.4759-10.2011>.
- 837 Paravic, Armin H., Maamer Slimani, David Tod, Uros Marusic, Zoran Milanovic, and Rado Pisot. 2018.  
838 "Effects and Dose–Response Relationships of Motor Imagery Practice on Strength Development in  
839 Healthy Adult Populations: A Systematic Review and Meta-Analysis." *Sports Medicine* 48 (5): 1165–  
840 87. <https://doi.org/10.1007/s40279-018-0874-8>.
- 841 Parvizi, Josef, Vinitha Rangarajan, William R Shirer, Nikita Desai, and Michael D Greicius. 2013. "Case  
842 Study The Will to Persevere Induced by Electrical Stimulation of the Human Cingulate Gyrus."  
843 *Neuron* 80 (6): 1359–67. <https://doi.org/10.1016/j.neuron.2013.10.057>.
- 844 Pessiglione, Mathias, Fabien Vinckier, Sébastien Bouret, Jean Daunizeau, and Raphaël Le Bouc. 2018.  
845 "Why Not Try Harder? Computational Approach to Motivation Deficits in Neuro-Psychiatric  
846 Diseases." *Brain* 141 (3): 629–50. <https://doi.org/10.1093/brain/awx278>.
- 847 Peters, Jan, and Christian Büchel. 2010. "Episodic Future Thinking Reduces Reward Delay Discounting  
848 through an Enhancement of Prefrontal-Mediotemporal Interactions." *Neuron* 66 (1): 138–48.  
849 <https://doi.org/10.1016/j.neuron.2010.03.026>.
- 850 Pfaff, Donald W., Eugene M. Martin, and Donald Faber. 2012. "Origins of Arousal: Roles for Medullary  
851 Reticular Neurons." *Trends in Neurosciences* 35 (8): 468–76.

- 852 <https://doi.org/10.1016/j.tins.2012.04.008>.
- 853 Poe, Gina R, Stephen Foote, Oxana Eschenko, Joshua P Johansen, Sebastien Bouret, Gary Aston-  
854 Jones, Carolyn W Harley, et al. 2020. "Locus Coeruleus: A New Look at the Blue Spot." *Nature*  
855 *Reviews. Neuroscience*. <https://doi.org/10.1038/s41583-020-0360-9>.
- 856 Porrino, Linda J., and Patricia S. Goldman-Rakic. 1982. "Brainstem Innervation of Prefrontal and Anterior  
857 Cingulate Cortex in the Rhesus Monkey Revealed by Retrograde Transport of HRP." *Journal of*  
858 *Comparative Neurology* 205 (1): 63–76. <https://doi.org/10.1002/cne.902050107>.
- 859 Prevost, Charlotte, Mathias Pessiglione, Elise Metereau, Marie-Laure Clery-Melin, and Jean-Claude  
860 Dreher. 2010. "Separate Valuation Subsystems for Delay and Effort Decision Costs." *Journal of*  
861 *Neuroscience* 30 (42): 14080–90. <https://doi.org/10.1523/JNEUROSCI.2752-10.2010>.
- 862 Reimer, Jacob, Matthew J McGinley, Yang Liu, Charles Rodenkirch, Qi Wang, David A McCormick, and  
863 Andreas S Tolias. 2016. "Pupil Fluctuations Track Rapid Changes in Adrenergic and Cholinergic  
864 Activity in Cortex." *Nature Communications* 7 (May): 13289. <https://doi.org/10.1038/ncomms13289>.
- 865 Salamone, John D., Mercè Correa, A. M. Farrar, and Susana Mingote. 2007. "Effort-Related Functions of  
866 Nucleus Accumbens Dopamine and Associated Forebrain Circuits." *Psychopharmacology* 191: 461–  
867 82.
- 868 Saper, Clifford B., Patrick M. Fuller, Nigel P. Pedersen, Jun Lu, and Thomas E. Scammell. 2010. "Sleep  
869 State Switching." *Neuron* 68 (6): 1023–42. <https://doi.org/10.1016/j.neuron.2010.11.032>.
- 870 Schmidt, Liane, Marie-Laure Cléry-Melin, Gilles Lafargue, Romain Valabrègue, Philippe Fossati, Bruno  
871 Dubois, and Mathias Pessiglione. 2009. "Get Aroused and Be Stronger: Emotional Facilitation of  
872 Physical Effort in the Human Brain." *Journal of Neuroscience* 29 (30): 9450–57.  
873 <https://doi.org/10.1523/JNEUROSCI.1951-09.2009>.
- 874 Schneider, Max, Laura Leuchs, Michael Czisch, Philipp G. Sämann, and Victor I. Spormaker. 2018.  
875 "Disentangling Reward Anticipation with Simultaneous Pupillometry / fMRI." *NeuroImage* 178  
876 (March): 11–22. <https://doi.org/10.1016/j.neuroimage.2018.04.078>.
- 877 Schultz, Wolfram. 2002. "Getting Formal with Dopamine and Reward." *Neuron* 36 (2): 241–63.  
878 [https://doi.org/10.1016/S0896-6273\(02\)00967-4](https://doi.org/10.1016/S0896-6273(02)00967-4).
- 879 Schultz, Wolfram, Peter Dayan, and P Read Montague. 1997. "A Neural Substrate of Prediction and  
880 Reward." *Science* 275 (5306): 1593–99. <http://www.ncbi.nlm.nih.gov/pubmed/9054347>.
- 881 Schwarz, Lindsay A., Kazunari Miyamichi, Xiaojing J. Gao, Kevin T. Beier, Brandon Weissbourd,  
882 Katherine E. Deloach, Jing Ren, et al. 2015. "Viral-Genetic Tracing of the Input-Output Organization  
883 of a Central Noradrenaline Circuit." *Nature* 524 (7563): 88–92. <https://doi.org/10.1038/nature14600>.
- 884 Shenhav, Amitai, Jonathan D Cohen, and Matthew M Botvinick. 2016. "Dorsal Anterior Cingulate Cortex  
885 and the Value of Control." *Nature Neuroscience* 19 (10): 1286–91. <https://doi.org/10.1038/nn.4384>.
- 886 Skvortsova, V., S. Palminteri, and Mathias Pessiglione. 2014. "Learning To Minimize Efforts versus  
887 Maximizing Rewards: Computational Principles and Neural Correlates." *Journal of Neuroscience* 34  
888 (47): 15621–30. <https://doi.org/10.1523/JNEUROSCI.1350-14.2014>.
- 889 Steinmetz, Janina, Brittany M. Tausen, and Jane L. Risen. 2018. "Mental Simulation of Visceral States  
890 Affects Preferences and Behavior." *Personality and Social Psychology Bulletin* 44 (3): 406–17.  
891 <https://doi.org/10.1177/0146167217741315>.
- 892 Takahashi, K., Y. Kayama, J. S. Lin, and K. Sakai. 2010. "Locus Coeruleus Neuronal Activity during the  
893 Sleep-Waking Cycle in Mice." *Neuroscience* 169 (3): 1115–26.  
894 <https://doi.org/10.1016/j.neuroscience.2010.06.009>.
- 895 Tillage, Rachel P., Genevieve E. Wilson, L. Cameron Liles, Philip V. Holmes, and David Weinshenker.  
896 2020. "Chronic Environmental or Genetic Elevation of Galanin in Noradrenergic Neurons Confers  
897 Stress Resilience in Mice." *The Journal of Neuroscience* 40 (39): JN-RM-0973-20.  
898 <https://doi.org/10.1523/jneurosci.0973-20.2020>.
- 899 Varazzani, Chiara, a. San-Galli, S. Gilardeau, and S. Bouret. 2015. "Noradrenaline and Dopamine  
900 Neurons in the Reward/Effort Trade-Off: A Direct Electrophysiological Comparison in Behaving  
901 Monkeys." *Journal of Neuroscience* 35 (20): 7866–77. <https://doi.org/10.1523/JNEUROSCI.0454-15.2015>.
- 902
- 903 Vinckier, Fabien, L. Rigoux, I.T. Kurniawan, C. Hu, Sacha Bourgeois-gironde, J. Daunizeau, and Mathias  
904 Pessiglione. 2018. "Sour Grapes and Sweet Victories : How Actions Shape Preferences." Edited by  
905 Samuel J. Gershman. *PLOS Computational Biology* 15 (1): e1006499.  
906 <https://doi.org/10.1371/journal.pcbi.1006499>.
- 907 Walton, Mark E., and Sebastien Bouret. 2019. "What Is the Relationship between Dopamine and Effort?"  
908 *Trends in Neurosciences* 42 (2): 79–91. <https://doi.org/10.1016/j.tins.2018.10.001>.

- 909 Wel, Pauline van der, and Henk van Steenbergen. 2018. "Pupil Dilation as an Index of Effort in Cognitive  
910 Control Tasks: A Review." *Psychonomic Bulletin & Review* 25 (6): 2005–15.  
911 <https://doi.org/10.3758/s13423-018-1432-y>.
- 912 Xiang, Liyang, Antoine Harel, Hong Ying Gao, Anthony E. Pickering, Susan J. Sara, and Sidney I. Wiener.  
913 2019. "Behavioral Correlates of Activity of Optogenetically Identified Locus Coeruleus Noradrenergic  
914 Neurons in Rats Performing T-Maze Tasks." *Scientific Reports* 9 (1): 1–13.  
915 <https://doi.org/10.1038/s41598-018-37227-w>.
- 916 Yüzgeç, Özge, Mario Prsa, Robert Zimmermann, and Daniel Huber. 2018. "Pupil Size Coupling to Cortical  
917 States Protects the Stability of Deep Sleep via Parasympathetic Modulation." *Current Biology*.  
918 <https://doi.org/10.1016/j.cub.2017.12.049>.
- 919 Zénon, Alexandre, Mariam Sidibé, and Etienne Olivier. 2014. "Pupil Size Variations Correlate with  
920 Physical Effort Perception." *Frontiers in Behavioral Neuroscience* 8 (August): 1–8.  
921 <https://doi.org/10.3389/fnbeh.2014.00286>.

922  
923  
924  
925  
926  
927  
928  
929  
930  
931  
932  
933  
934  
935  
936  
937  
938  
939  
940  
941  
942  
943  
944  
945  
946  
947  
948  
949  
950  
951  
952  
953  
954  
955  
956  
957  
958  
959



960 **Supplementary Materials and Methods**

961

962 **Controlling for luminance-driven pupil response**

963

964 To rule out brightness-induced pupil dilation and to validate our selection of theoretically  
965 isoluminant stimuli, we recorded pupil response during a control experiment at the end of the fMRI  
966 scan. Here, the same participants received similar visual stimulation as in the main experiment,  
967 but without informative cues or any need for making a choice. Participants were first presented  
968 with the same fixation screen (Fig 2A; screen with “XXX”) with letters written in green for 3 s. This  
969 was followed by the same screen but with all Xs replaced by Ys, and in either one of the sides  
970 (counterbalanced), the letters were printed in either purple or blue ink (to mimic the visual change  
971 found in the main experiment) for another 3 s period. All three color hues are theoretically  
972 isoluminant, as described in the Methods section. There were 20 trials for each side and each  
973 hue, summing to 80 trials. We confirm that indeed the hue selection in a task without any reward-  
974 effort decision making did not evoke meaningful luminance-driven pupil variance (Fig S1). First,  
975 the scale of pupil response variance in the main task was at least 6 times larger than that in the  
976 control experiment. Second, if any, the deflection in pupil response to cue onset was negative, as  
977 opposed to that found in the main task. Third, this control experiment revealed no difference in  
978 averaged pupil size across the entire stimulus duration between the two isoluminant hues (purple  
979 and blue) used in the main task, paired-samples t-test:  $t(46)=0.29$ ,  $p=0.76$  (2 missing data). These  
980 results confirm that the pupil dilation observed in the main task was primarily driven by meaningful  
981 cognitive considerations provoked by the choice task, in this case by effort-reward tradeoffs, and  
982 not by task-irrelevant physical differences in the stimuli.

983

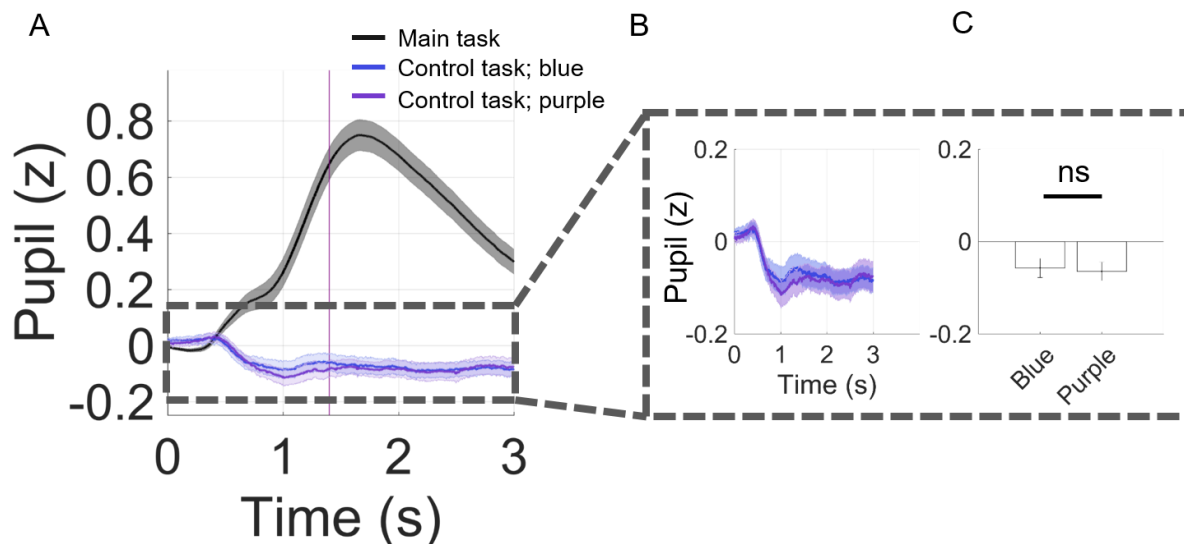

984 **Fig. S1. Pupil during main versus control experiment.** A) Pupil time course in main and in  
985 control task for stimuli in blue and purple ink, subtracted by pupil baseline level (PBL). Inset: B)  
986 Zoomed-in pupil time course and C) averaged pupil size across 3 s, showing no difference in pupil  
987 responses between blue and purple. Bar plots display means  $\pm$  1 standard error of the mean  
988 (SEM).

989

990

991

992 **Controlling for other variables in extended regression of choice (Fig 2D)**

993  
994 Here we supplement the statistical results of the regression of choice reported in the main text  
995 (Fig 2D). In this extended regression, we also accounted for variables including RT ( $t_{RT}(48)=-3.40$ ,  
996  $p=0.0013$ ), pupil baseline level (PBL),  $t_{PBL}(48)=0.25$ ,  $p=0.80$ , and many others ( $t_{pupil\_rate}(48)=-1.02$ ,  
997  $p=0.31$ ;  $t_{reward*PBL}(48)=0.22$ ,  $p=0.82$ ;  $t_{effort*PBL}(48)=-0.31$ ,  $p=0.75$ ;  $t_{reward*effort*PBL}(48)=-0.61$ ,  $p=0.54$ ;  
998  $t_{reward*pupil\_rate}(48)=-0.78$ ,  $p=0.44$ ;  $t_{reward*effort*pupil\_rate}(48)=1.21$ ,  $p=0.23$ ;  $t_{constant}(48)=4.37$ ,  $p=0.0001$ ).  
999 Importantly, the extended regression had a higher model-fit (adjusted  $R$ -squared) than the  
1000 standard regression that only contained reward, effort, and reward-by-effort,  $t(48)=5.35$ ,  $p<0.0001$ ,  
1001 suggesting that pupil measures together with other task parameters such as reward, effort, and  
1002 response time, can explain choice above and beyond the ‘standard’ option attributes (reward and  
1003 effort).

1004

1005

1006 **Calculation of effort slope**

1007

1008 To calculate the effort slope in all our analyses (e.g., Fig 3), for each subject we first averaged the  
1009 pupil rate (z-scored within subject) in each of the 6 effort levels separately for trials where subjects  
1010 chose the effortful option and those where they chose the non-effortful option. We then ran a  
1011 simple regression of the averaged pupil rate on effort levels (levels 4-9), separately for each choice  
1012 outcome. Without any missing data, the effort slope should be estimated based on 6 pairs of data  
1013 points. However, choice was clearly affected by effort level (Fig 1C), thus one concern is that for  
1014 some subjects, there might have been too many empty cells (e.g., if options with effort levels 7-9  
1015 were never selected by a participant). If this were the case then there would have unequal number  
1016 of data points to estimate the effort slope in one choice outcome versus another. To address this  
1017 concern, we found that on average there were  $> 5$  pairs of data points in both choice outcomes  
1018 ( $M_{non-effortful}=5.59$ ,  $SD=0.67$ ,  $M_{effortful}=5.61$   $SD=0.7$ ), and importantly there was no significant  
1019 difference between the two choice outcomes,  $t(48)=0.13$ ,  $p=0.89$ . This result assured us that the  
1020 estimation of effort slopes between the two choice outcomes was comparable.

1021

1022

1023 **Control analysis for pupil baseline level (PBL)**

1024

1025 To investigate how other aspects of the arousal system function may relate to choice in our  
1026 experimental design, we conducted a whole set of other analyses. First, we examined choice  
1027 proportions as a function of PBL median/tertile/quartile splits. We did not find any choice  
1028 differences across PBL bins,  $F_s<1.2$ ,  $p_s>0.3$  (Fig S2A). Second, we ran a logistic regression of  
1029 choice on PBL, RT, reward, effort, and the interactions. We found no effect of PBL or any  
1030 interactions with PBL (Fig S2B). Third, we inspected whether regressing out influences of previous  
1031 trial from PBL would improve regression of choice of the current trial. To do this, we first ran a  
1032 linear regression of the current trial’s PBL with reward, effort, choice, RT, and ITI of previous trial  
1033 ( $t-1$ ) as regressors. Then we took the residual variance of this regression and used it as a  
1034 regressor together with RT, reward, effort, reward-by-effort interaction to fit choice of current trial.  
1035 This analysis shows no significant effect of the residual PBL (PBL\*) on explaining choice of current  
1036 trial (Fig S2C). Together, these analyses show no contribution of background (tonic) arousal states

1037 to choice rate, suggesting that the results reported in the main text were specific to effort-specific  
 1038 representations during the decision process (within-trial).  
 1039

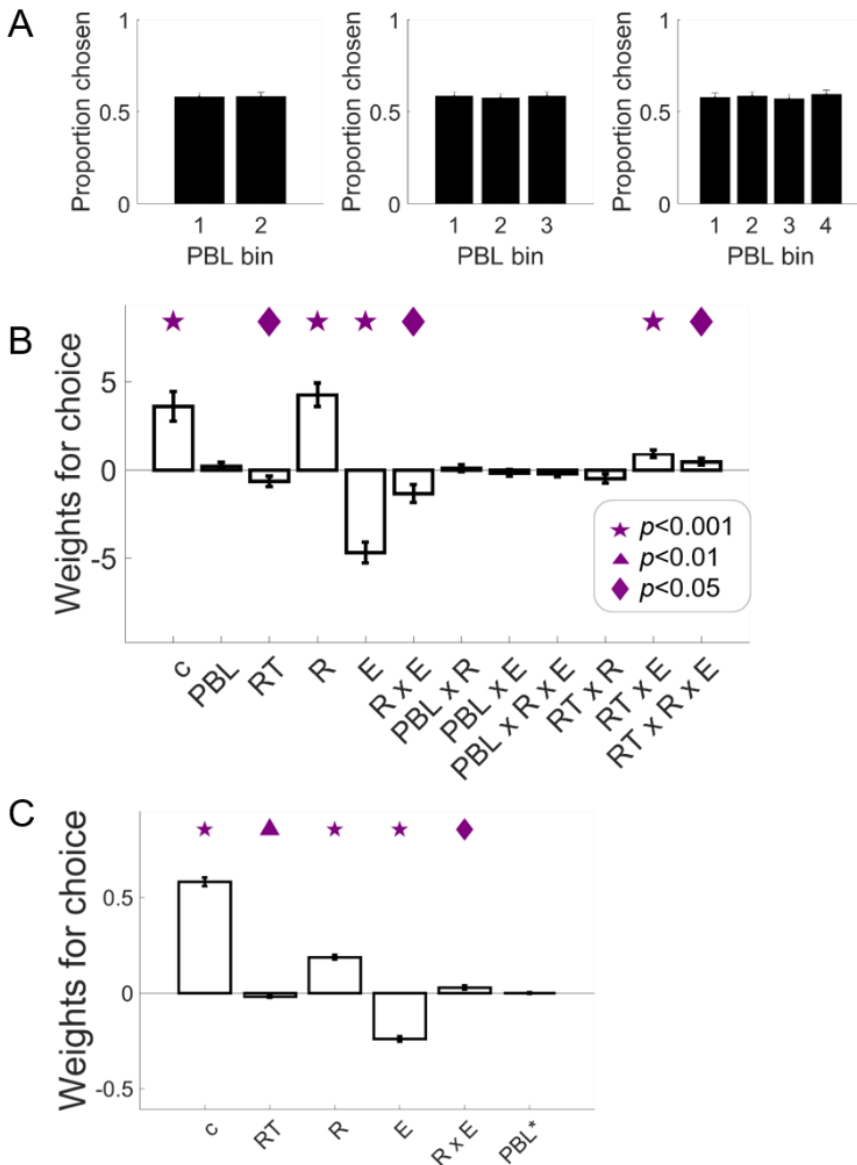

1040 **Fig. S2. No effects of endogenous arousal fluctuations on choice rate.** A) Choice proportion  
 1041 for the effortful option as a function of pre-trial pupil baseline level (PBL) bins. Bar plots display  
 1042 means  $\pm$  1 standard error of the mean (SEM). B) Weights of logistic regression of choice on  
 1043 reward, effort, RT, PBL, and the interactions. B) Weights of logistic regression of choice on reward,  
 1044 effort, RT, and residual variance of PBL after regressing out influences from previous trial (t-1).  
 1045 Bar plots display means  $\pm$  1 standard error of the mean (SEM). Abbreviations: c=constant,  
 1046 PBL=pupil baseline levels, RT=reaction time, R=reward levels, E=effort levels, PBL\*=residual  
 1047 PBL.  
 1048  
 1049

1050 In addition, we also directly tested for an effort-by-choice effect in PBL (Fig S3), revealing a non-  
 1051 significant choice difference (effortful vs non-effortful) of the effort slopes in PBL,  $t(48)=0.45$ ,

1052  $p=0.65$ . The behavioral measure of effort sensitivity was not significantly associated with the effort-  
1053 by-choice effect either, *robust regression*  $b(47)=0.35$ ,  $p=0.39$ . These results confirm that the  
1054 choice-modulated effort representations reported in the main text are primarily expressed in how  
1055 fast the pupil dilates but not in endogenous pre-trial pupil fluctuations.  
1056

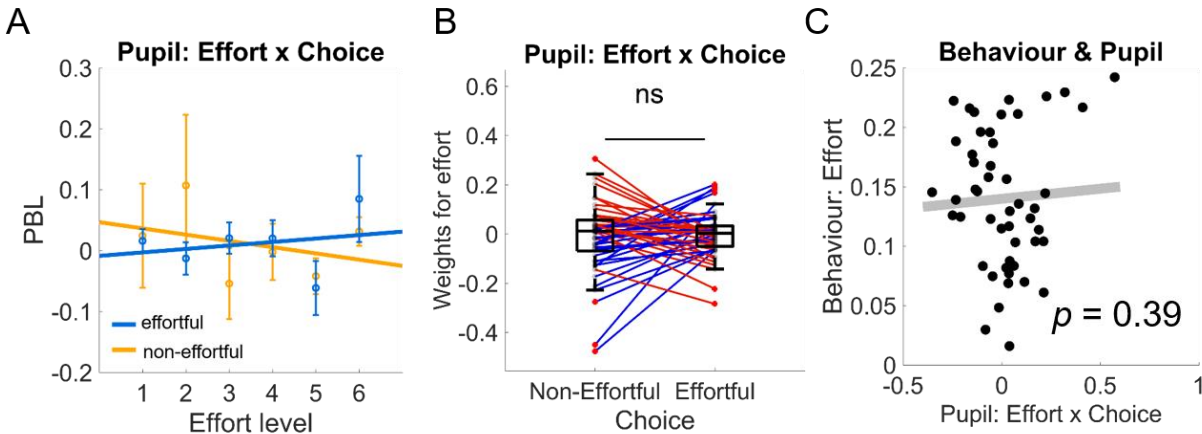

1057  
1058  
1059 **Fig. S3. No evidence for energization signals in pupil baseline level (PBL).** Non-significant  
1060 effort-by-choice interaction results and non-significant correlation with behavioral effort sensitivity  
1061 for PBL. Bar plots display means  $\pm$  1 standard error of the mean (SEM).  
1062

1063  
1064 **Control analysis for effects of value (Fig 3)**  
1065

1066 To rule out the alternative explanation that pupil rate in this experiment could be simply signalling  
1067 value, we tested for a reward-by-choice effect in pupil rate (Fig S5), revealing a non-significant  
1068 choice difference (effortful vs non-effortful) of the reward slopes,  $t(48)=0.22$ ,  $p=0.82$ . The  
1069 behavioral measure of reward sensitivity was not significantly associated with the reward-by-  
1070 choice effect either, *robust regression*  $b(47)=0.54$ ,  $p=0.22$ . Together with the analyses on pupil  
1071 rate residuals reported in the main text (Figs S4), these results confirm the pupil rate's role in  
1072 anticipated energization, signaling effort amounts that one has committed to rather than signaling  
1073 reward value.  
1074



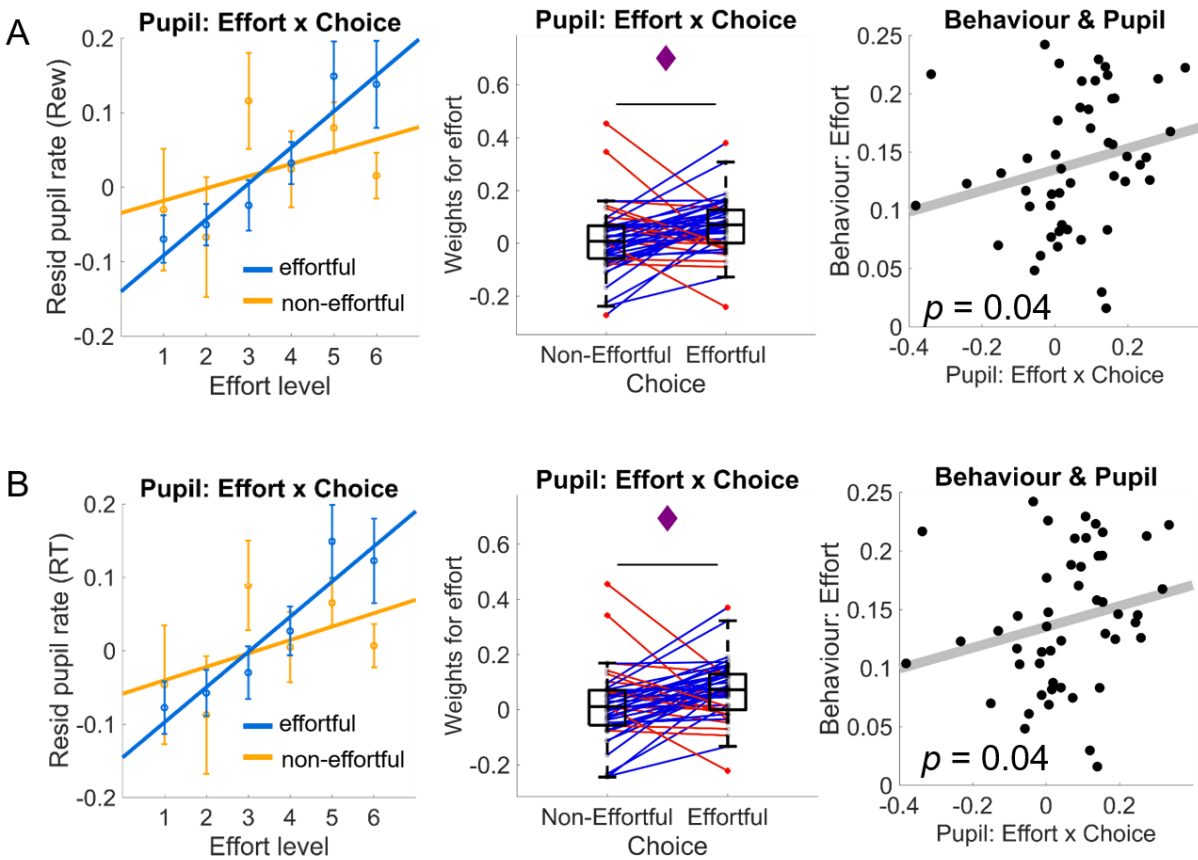

1075  
1076 **Fig. S4. Energization signal in pupil rate is independent of reward value and RT.** Analyses  
1077 with residual pupil rate after regressing out the effect of reward (A) and RT (B). We replicated the  
1078 effects reported in Fig 3, showing significant effort-by-choice interaction results and correlation  
1079 with behavioral effort sensitivity for residual pupil rate after regressing out (one at a time) the effect  
1080 of reward and RT. Bar plots display means  $\pm$  1 standard error of the mean (SEM). See main text  
1081 for statistical results.

1082  
1083

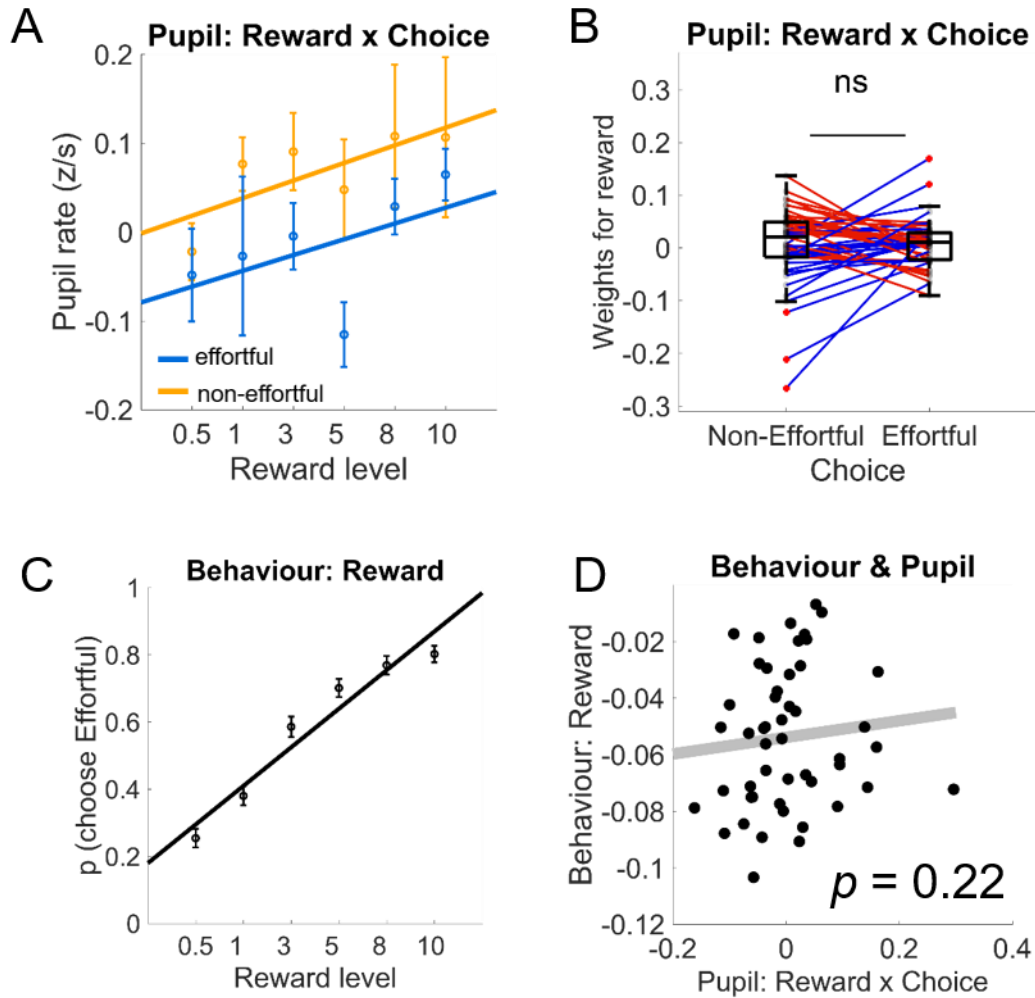

1084  
1085 **Fig. S5. No evidence for choice-modulated reward signals in pupil rate.** Non-significant  
1086 reward-by-choice interaction results and non-significant correlation with behavioral reward  
1087 sensitivity in pupil rate. Bar plots display means  $\pm$  1 standard error of the mean (SEM).

1088  
1089

1090
